1 **Phylogeography and reassortment patterns of human influenza A viruses in sub-**  
2 **Saharan Africa**

3

4 **Authors:** D. Collins Owuor<sup>1\*</sup>, Zaydah R. de Laurent<sup>1</sup>, John W. Oketch<sup>1</sup>, Nickson Murunga<sup>1</sup>,  
5 James R. Otieno<sup>1</sup>, Sandra S. Chaves<sup>2,3</sup>, D. James Nokes<sup>1,4</sup>, and Charles N. Agoti<sup>1,5</sup>

6

7 **Affiliations:**

8 1. Epidemiology and Demography Department, Kenya Medical Research Institute  
9 (KEMRI) - Wellcome Trust Research Programme, Kilifi, Kenya.

10 2. Influenza Division, Centers for Disease Control and Prevention (CDC), Nairobi,  
11 Kenya.

12 3. Influenza Division, National Center for Immunization and Respiratory Diseases  
13 (NCIRD), CDC, Atlanta, Georgia, USA.

14 4. School of Life Sciences and Zeeman Institute for Systems Biology and Infectious  
15 Disease Epidemiology Research (SBIDER), University of Warwick, Coventry,  
16 UK.

17 5. School of Public Health and Human Sciences, Pwani University, Kilifi, Kenya.

18

19 **\* Corresponding author:** D. Collins Owuor ([collinsdowuor@gmail.com](mailto:collinsdowuor@gmail.com)).

20

21

22 **Abstract**

23 **Background.** The role of sub-Saharan Africa in the global spread of influenza viruses  
24 remains unclear due to insufficient spatiotemporal sequence data.

25

26 **Methods.** Here, we analyzed 222 codon-complete sequences of influenza A viruses (IAVs)  
27 sampled between 2011 and 2013 from five countries across sub-Saharan Africa (Kenya,  
28 Zambia, Mali, Gambia, and South Africa); these genomes were compared with 1,209  
29 contemporaneous global genomes using phylogeographical approaches.

30

31 **Results.** The spread of influenza in sub-Saharan Africa was characterized by (i) multiple  
32 introductions of IAVs into the region over consecutive influenza seasons, with viral  
33 importations originating from multiple global geographical regions, some of which persisted  
34 in circulation as intra-subtype reassortants for multiple seasons, (ii) virus transfer between  
35 sub-Saharan African countries, and (iii) virus export from sub-Saharan Africa to other  
36 geographical regions.

37

38 **Conclusion.** Despite sparse data from influenza surveillance in sub-Saharan Africa, our  
39 findings support the notion that influenza viruses persist as temporally structured migrating  
40 metapopulations in which new virus strains can emerge in any geographical region, including  
41 in sub-Saharan Africa; these lineages may have been capable of dissemination to other  
42 continents through a globally migrating virus population. Further knowledge of the viral  
43 lineages that circulate within understudied sub-Saharan Africa regions is required to inform  
44 vaccination strategies in those regions.

45

46 **Keywords:** A(H1N1)pdm09; A(H3N2); reassortment; sub-Saharan Africa; PERCH Study.

## 47 **Introduction**

48 The rapid and widespread global circulation of influenza A(H1N1)pdm09 virus in 2009 [1-4]  
49 and severe acute respiratory syndrome coronavirus 2 (SARS-CoV-2) in 2020 [5-9]  
50 demonstrate how respiratory viruses can quickly spread globally following their emergence.  
51 Influenza A viruses (IAV) and novel coronaviruses remain a major public health threat with  
52 potential to cause pandemics resulting in economic losses, social lockdowns, and millions of  
53 deaths [10-13]. Therefore, global surveillance efforts to monitor these pathogens through  
54 various initiatives, for example, the Global Influenza Surveillance and Response System  
55 (GISRS) [14] remain justified to improve understanding of their global transmission  
56 networks and dynamics for appropriate interventions.

57

58 The global surveillance of influenza through GISRS has resulted in the generation of  
59 geographically and temporally extensive virus sequence data, which has provided a unique  
60 opportunity to investigate the global spread of influenza viruses [15-20]. Three key  
61 hypotheses have been previously proposed to explain how influenza viruses spread globally.  
62 First, the “source-sink” model, whereby East and Southeast (E-SE) Asia represent a global  
63 source population of novel influenza virus strains, while temperate regions represent  
64 ecological sinks [15, 16, 18]. Second, influenza viruses occur as temporally migrating  
65 metapopulations, whereby new virus strains can emerge in any geographical region, with the  
66 location of the source population changing from season-to-season [17]. Third, the global  
67 patterns of spread of seasonal influenza viruses have been shown to vary with the rate of  
68 genetic and antigenic evolution of different influenza virus types and subtypes [19].  
69 However, despite documented high disease burden [21-23], the role of sub-Saharan African  
70 countries in the global spread of influenza viruses remains unclear due to insufficient  
71 surveillance and sequence data from these regions [22, 24].

72

73 To improve understanding of IAV dispersal pathways in sub-Saharan Africa and the context  
74 of locally observed virus diversity, we studied the spread of A(H1N1)pdm09 and A(H3N2)  
75 viruses in the region using phylogeographical methods based on codon-complete sequences  
76 from samples obtained from a multi-country surveillance involving five sub-Saharan African  
77 countries. We then compared these data with sequences that were available from other  
78 countries in sub-Saharan Africa and around the globe.

79

## 80 **Materials and Methods**

81 **Sample sources and molecular screening.** The samples analysed here were collected under  
82 three distinct studies: (a) the Pneumonia Etiology Research for Child Health (PERCH) study,  
83 which enrolled children aged between 1-59 months admitted to hospital with severe or very  
84 severe pneumonia in surveillance sites in Kenya, Zambia, Mali, Gambia, and South Africa  
85 [25-27] from August 2011 through January 2014; (b) a Kenya-wide surveillance of influenza  
86 viruses in Kenya among patients of any age hospitalized with severe acute respiratory illness  
87 (SARI) [28] from January 2011 through December 2013; and (c) inpatient paediatric (1-59  
88 months) pneumonia surveillance of influenza viruses in Kilifi County and Referral Hospital  
89 (KCH) [29] from January 2011 through December 2013. Detailed descriptions of the study  
90 sites and population, sample collection, transportation, storage, and processing have been  
91 described elsewhere; PERCH study [25, 27, 30], the countrywide surveillance study [28], and  
92 the inpatient paediatric pneumonia surveillance study [29]. For the PERCH study, a total of  
93 138 IAV positive specimens were analysed from five surveillance sites from five countries,  
94 **Figure S1A:** Kenya, 27; South Africa, 40; Zambia, 27; The Gambia, 22; and Mali, 22. A  
95 further 106 A(H1N1)pdm09 and 16 A(H3N2) virus sequences were available from the  
96 countrywide surveillance study and the paediatric KCH study, respectively.

97

98 **RNA extraction and multi-segment real-time PCR (M-RTPCR) for IAV.** Viral RNA  
99 extraction and M-RTPCR was undertaken as previously described [29]. Briefly, we  
100 performed viral nucleic acid extraction from IAV positive samples (Cycle threshold (Ct)  
101 <35.0) using the QIAamp Viral RNA Mini Kit (Qiagen). We reverse transcribed ribonucleic  
102 acid (RNA) and amplified the codon-complete region of influenza in a single M-RTPCR  
103 using the Uni/Inf primer set [31] in 25  $\mu$ L PCR reactions. We evaluated successful  
104 amplification by running the M-RTPCR amplicons on 2% agarose gel and visualized the gels  
105 looking for expected bands on a UV transilluminator after staining with RedSafe Nucleic  
106 Acid Staining solution (iNtRON Biotechnology Inc.,).

107

108 **IAV codon-complete sequencing and genome assembly.** Following M-RTPCR, we  
109 purified, quantitated and normalized amplicons to 0.2 ng/ $\mu$ L as described previously [29].  
110 Briefly, the amplicons were purified with 1X AMPure XP beads (Beckman Coulter Inc.),  
111 quantified with Quant-iT dsDNA High Sensitivity Assay (Invitrogen), and normalized to 0.2  
112 ng/ $\mu$ L. Indexed paired end libraries were generated from 2.5  $\mu$ L of 0.2 ng/ $\mu$ L amplicon pool  
113 using Nextera XT Sample Preparation Kit (Illumina) following the manufacturer's protocol.  
114 Amplified libraries were purified using 0.8X AMPure XP beads, quantitated using Quant-iT  
115 dsDNA High Sensitivity Assay (Invitrogen), and evaluated for fragment size in the Agilent  
116 2100 BioAnalyzer System using the Agilent High Sensitivity DNA Kit (Agilent  
117 Technologies). Libraries were then diluted to 2nM in preparation for pooling and  
118 denaturation for running on the Illumina MiSeq (Illumina). Pooled libraries were NaOH  
119 denatured, diluted to 12.5 pM and sequenced on the Illumina MiSeq using 2 x 250 bp paired  
120 end reads with the MiSeq v2 500 cycle kit (Illumina). Five percent Phi-X (Illumina) spike-in  
121 was added to the libraries to increase library diversity by creating a more diverse set of

122 library clusters. We carried out contiguous nucleotide sequence assembly from the sequence  
123 data using the FLU module of the Iterative Refinement Meta-Assembler (IRMA) [32] using  
124 IRMA default settings. All generated sequence data were deposited in the Global Initiative on  
125 Sharing All Influenza Data (GISAID) EpiFlu™ database  
126 (<https://platform.gisaid.org/epi3/cfrontend>) under the accession numbers EPI\_ISL\_509524-  
127 EPI\_ISL\_509526, EPI\_ISL\_509564-EPI\_ISL\_509566, EPI\_ISL\_509655- EPI\_ISL\_509669,  
128 EPI\_ISL\_509687, EPI\_ISL\_510040-EPI\_ISL\_510043, EPI\_ISL\_510078- EPI\_ISL\_510080,  
129 EPI\_ISL\_510102, EPI\_ISL\_510152-EPI\_ISL\_510159, EPI\_ISL\_509025-EPI\_ISL\_509058,  
130 EPI\_ISL\_509396-EPI\_ISL\_509411, and EPI\_ISL\_511774-EPI\_ISL\_511804.

131

132 **Collation of contemporaneous global sequence dataset.** Global comparison datasets for  
133 influenza A(H1N1)pdm09 and A(H3N2) viruses were retrieved from the GISAID EpiFlu™  
134 database (<https://platform.gisaid.org/epi3/cfrontend>; accessed 20 March 2022). The datasets  
135 were prepared to determine the relatedness of the viruses in this report to those circulating  
136 around the world thus understand their global context. Only codon-complete full-length  
137 genome sequences sampled between January 2010 and December 2013 were included to  
138 improve the phylogenetic resolution of the analyses and investigate reassortment patterns.  
139 For A(H1N1)pdm09 virus, the final dataset of 460 global sequences sampled from January  
140 2010 to December 2013 was available (numbers in parenthesis indicate number of  
141 sequences): Africa (13); Asia (148); Europe (82); North America (170); South America (2);  
142 Oceania (39). For A(H3N2) virus, the final dataset of 749 global sequences sampled from  
143 January 2010 to December 2013 was available (numbers in parenthesis indicate number of  
144 sequences): Africa (7); Asia (196); Europe (38); North America (178); South America (199);  
145 Oceania (138). The accession numbers for the global genome sequences are available in the

146 study's GitHub repository, ([https://github.com/DCollinsOwuor/Phylogeography-and-](https://github.com/DCollinsOwuor/Phylogeography-and-reassortment-patterns-of-human-influenza-A-viruses-in-sub-Saharan-Africa)  
147 [reassortment-patterns-of-human-influenza-A-viruses-in-sub-Saharan-Africa](https://github.com/DCollinsOwuor/Phylogeography-and-reassortment-patterns-of-human-influenza-A-viruses-in-sub-Saharan-Africa)).

148

149 **Phylogenetic analysis.** We aligned and translated consensus nucleotide sequences in  
150 AliView v1.26 [33] and concatenated individual gene segments into codon-complete  
151 genomes using SequenceMatrix v16.0.1 [34]. We constructed codon-complete gene segment  
152 and concatenated genome phylogenetic trees of A(H1N1)pdm09 and A(H3N2) viruses with  
153 maximum-likelihood (ML) and bootstrap analysis of 1,000 replicates. We inferred the best-fit  
154 nucleotide substitution models using IQ-TREE v1.6.11 [35, 36] and implemented those  
155 chosen by the Bayesian Information Criterion for each concatenated virus genome. We  
156 visualized and annotated the phylogenetic trees using ggtree R package v2.3.5 [37] and used  
157 the full-length HA sequences of all virus sequences generated from the PERCH, countrywide  
158 surveillance, and inpatient paediatric pneumonia surveillance study to characterize  
159 A(H1N1)pdm09 and A(H3N2) viruses into clades using PhyCLIP v2.0 [38] and IAV clade  
160 representative strains.

161

162 **Reassortment analysis.** We used tanglegrams of the time-resolved trees from TreeTime  
163 v0.8.5 [39] to visualize the phylogenetic relationships between individual codon-complete  
164 gene segments of A(H1N1)pdm09 and A(H3N2) viruses using dendextend R package  
165 v1.15.2 [40] and explored the pairwise phylogenetic congruence between IAV gene segments  
166 to identify intra-subtype reassortment. Tanglegrams are sets of two trees representing  
167 different segments of IAVs, with tips from matching viruses connected by lines. We  
168 compared topologies of tanglegram trees that matched the phylogeny of HA segment with  
169 that of other segments, coloring tanglegram twines based on observed reassortment patterns.

170 We then estimated the reassortment rates (the number of reassortment events per lineage per  
171 year (events/lineage/year)) among the PERCH study and sub-Saharan African IAVs using a  
172 coalescent reassortant constant population model (CoalRe) [41] in BEAST2 v.2.6.6  
173 (<https://www.beast2.org/>) with parameters: GTR + I + G4 substitution model, strict clock,  
174 prior for reassortment rate = exponential with mean 0.25, chain length of 500 million, and 10  
175 per cent burn-in. We then used the Graph-incompatibility-based Reassortment Finder  
176 (GiRaF) tool [42] to computationally assess reassortment among IAVs. Our GiRaF runs, that  
177 computationally assessed reassortments, converged with an average standard deviation of  
178 split frequency < 0.01, tree length estimated sample size (ESS) value > 100, tree length  
179 potential scale reduction factors (PSRF) of 1.0, and a maximum split frequency PSRF of  
180 1.00–1.002 (**Tables 1 and 2**). We manually discarded the first 25 percent of trees from each  
181 of the two runs (burn-in), then combined and processed the remaining trees. Only  
182 reassortment events with a high confidence value ( $\geq 0.70$ ) and reassortant sets predicted in at  
183 least three of twenty-eight gene pairwise comparisons, as recommended by GiRaF developers  
184 were reported. We ran two simultaneous runs of MrBayes v3.2.7 [43] on the datasets  
185 (A(H1N1)pdm09 viruses, 200 million generations; A(H3N2) viruses, 100 million  
186 generations) under a GTR+I+ $\Gamma$  substitution model and sampled trees at every 200,000th  
187 generation.

188

189 **Spatial dynamics of spread of IAVs.** We conducted a phylogeographical analysis to assess  
190 the global spread of A(H1N1)pdm09 and A(H3N2) viruses using methods implemented in  
191 BEAST v1.10.4 package [44], with an asymmetric discrete trait approach that applied the  
192 Bayesian stochastic search variable selection (BSSVS) model. To reduce the complexity of  
193 the maximum clade credibility (MCC) inference, we categorized location states into  
194 geographical regions (“Africa”, “Asia”, “E-SE Asia”, “Europe”, “North America”, “South



195 America”, or “Oceania”) and visualized phylogeographic inferences with the SPREAD3  
196 software v0.9.7.1c package [45]. Due to the important role of E-SE Asia in the global spread  
197 of influenza viruses, we partitioned Asia into E-SE Asia and rest of Asia to elucidate the  
198 geographical transition states associated with E-SE. To visualize the geographic spread of the  
199 virus over time, we generated a D3 file using SPREAD3 v0.9.7.1c package and used a global  
200 geo.json file for visualization. We then used the resulting log files to calculate the estimated  
201 virus migration rates between regions and Bayes factor (BF) values for significant migration  
202 rates between discrete locations: we deemed  $\geq 1,000$  as decisive support,  $100 \leq \text{BF} < 1000$  as  
203 very strong support,  $10 \leq \text{BF} < 100$  as strong support, and  $3 \leq \text{BF} < 10$  as supported rates.

204

205 We also used the ML tree topologies for A(H1N1)pdm09 and A(H3N2) viruses from our  
206 migration models to estimate the number of virus transmission events between sub-Saharan  
207 Africa and the rest of the world. Using the date and location-annotated tree topologies, we  
208 counted the number of transitions within and between sub-Saharan Africa and the rest of the  
209 world and plotted using ggplot2 v3.3.3 R package [37].

210

## 211 **Ethics**

212 Scientific and ethical clearance for the study was obtained from institutional ethics review  
213 boards within each study country in Africa, the UK, and USA [26]. Additional ethical  
214 approval was sought and received from KEMRI Scientific Steering Committee (SSC# 1055  
215 and 1433) and Oxford Tropical Research Ethics Committee (OxTREC# Ethics ID:60-90).  
216 Informed consent was sought and received from the study participants for the study.

217

## 218 **Results**

219 **IAV sequencing and codon-complete genome assembly of IAV genomes.** Of the 138 IAV  
220 positive samples that were available from the PERCH study, 100 (73%) were successfully  
221 sequenced. The recovered genome sequences were classified into A(H1N1)pdm09 (n=31)  
222 and A(H3N2) (n=69). These were combined with the additional sequences from Kenya (106  
223 for A(H1N1)pdm09 and 16 for A(H3N2)). Among A(H1N1)pdm09 viruses from the PERCH  
224 study, all viruses from 2011-13 fell into six clades namely, clade 3 (n=5), clade 7 (n=1), clade  
225 8 (n=2), clade 6A (n=1), clade 6B (n=2), and clade 6C (n=20), **Figure 1** and **Figure S1B**.  
226 Among A(H1N1)pdm09 viruses from the countrywide Kenya study, all viruses from 2011-13  
227 fell into clade 6 (n=96) and clade 6C (n=10), **Figure 1** and **Figure S1B**. For A(H3N2)  
228 viruses, all PERCH Africa study viruses from 2011-13 fell into five clades namely, clade 3A  
229 (n=6), clade 3B (n=2), clade 3C.2 (n=1), clade 3C.3 (n=39), and clade 7 (n=21), **Figure 2** and  
230 **Figure S1C**. Among A(H3N2) viruses from the KCH paediatric study, all viruses from 2011-  
231 13 fell into clade 3B (n=4) and clade 7 (n=12), **Figure 2** and **Figure S1C**.

232

233 **Patterns of reassortment of IAVs from sub-Saharan Africa.** We investigated the  
234 reassortment patterns by comparing the position of viruses on the eight segment-specific  
235 phylogenies of A(H1N1)pdm09 and A(H3N2) viruses to identify inconsistencies arising from  
236 intra-subtype reassortment. For most of the virus strains, those belonging to the same clade,  
237 as inferred from HA phylogeny, clustered together on phylogenies generated from the seven  
238 remaining gene segments for A(H1N1)pdm09 (**Figure 1**) and A(H3N2) viruses (**Figure 2**),  
239 respectively. However, in 44 (29%) A(H1N1)pdm09 virus (**Figure 1**) and eight (9%)  
240 A(H3N2) virus (**Figure 2**), intra-subtype reassortants were suspected based on tip locations  
241 of viruses in the gene segment phylogenies. Of these reassortants, 31 A(H1N1)pdm09 and  
242 four A(H3N2) viruses were identified among our PERCH study samples. GiRaF correctly  
243 identified all the 52 intra-subtype reassortant viruses. Interestingly, ten of the 44

244 A(H1N1)pdm09 and two of the eight A(H3N2) reassortant viruses were recently identified in  
245 a continentwide reassortment analysis of IAVs in Africa using GiRaF [46].

246

247 The relatedness of these reassortant viruses were visualized using tanglegrams based on  
248 pairwise phylogenetic congruence between codon-complete gene segments for  
249 A(H1N1)pdm09 (**Figure 3**) and A(H3N2) (**Figure 4**) viruses, with tanglegram twines  
250 colored by virus clade to highlight reassortant strains. Additionally, for the viruses detected in  
251 sub-Saharan Africa, coalescent model analysis estimated a mean reassortment rate of 0.0225  
252 [95% HPD, 0.1272-0.3231] events/lineage/year among A(H1N1)pdm09 viruses and a mean  
253 reassortment rate of 0.0577 [95% HPD, 0.0146-0.1027] events/lineage/year among A(H3N2)  
254 viruses. We further observed that the reassortant A(H1N1)pdm09 and A(H3N2) viruses  
255 persisted in circulation for 1-2 consecutive years in sub-Saharan Africa based on their date-  
256 annotated tree topologies.

257

258 **Viral imports and exports in sub-Saharan Africa.** We assessed how 150 A(H1N1)pdm09  
259 virus and 94 A(H3N2) virus genomes from sub-Saharan Africa compared to 441  
260 A(H1N1)pdm09 and 749 A(H3N2) contemporaneous virus genomes, sampled globally by  
261 inferring their phylogenies. For A(H1N1)pdm09 virus, we inferred 15 importations  
262 originating from outside sub-Saharan Africa (seven from North America, six from Asia, and  
263 two from Europe), which represent 15 independent introductions into sub-Saharan Africa  
264 from geographical locations outside the region, **Figure 5A**. We also inferred four virus  
265 location transition events among the sub-Saharan African countries. Additionally, we  
266 captured six virus export events from sub-Saharan Africa to North America, Asia, and  
267 Europe, all occurring from Kenya, **Figure 5A**. For A(H3N2) viruses, we inferred 10

268 importations originating from outside sub-Saharan Africa (three each from North America  
269 and Asia and two each from Oceania and South America), which represent 10 independent  
270 introductions into sub-Saharan Africa from geographical locations outside the region, **Figure**  
271 **5B**. Furthermore, we inferred 13 virus location transition events among the sub-Saharan  
272 African countries. Additionally, six virus export events from sub-Saharan Africa to North  
273 America and Oceania were inferred (**Figure 5B**).

274

275 **Global migration dynamics of IAVs.** For A(H1N1)pdm09 virus, we observed significant  
276 migration pathways from E-SE Asia (0.81-3) into multiple geographical regions including  
277 sub-Saharan Africa, Asia, Europe, North America, and Oceania. Additionally, we observed  
278 significant migration pathways from North America (0.52-0.73) to E-SE Asia, Europe, and  
279 Oceania, **Table 3**. The observed migration pathways corroborate these results, **Figure S2**.  
280 For A(H3N2) virus, we observed significant migration pathways from E-SE Asia (0.62-3.34)  
281 into all other geographical regions including sub-Saharan Africa, and from North America  
282 (0.6-1.63) to Europe, Oceania, and South America, **Table 4**. The global migration pathways  
283 for A(H3N2) corroborate these results, **Figure S3**.

284

## 285 **Discussion**

286 We observed that IAV strains from 2011-13 from our study evolved over consecutive  
287 influenza seasons and fell into distinct A(H1N1)pdm09 and A(H3N2) virus clades, some of  
288 which persisted in circulation as intra-subtype reassortants for consecutive influenza seasons.  
289 Furthermore, we observed multiple introductions of IAVs into sub-Saharan Africa over  
290 consecutive influenza seasons, with viral importations originating from multiple global  
291 geographical regions, for example, North America, Asia, Europe, and Oceania. Additionally,

292 we inferred virus transfer between the sub-Saharan African countries and virus exports from  
293 sub-Saharan Africa to other geographical regions, for example, North America, Asia, and  
294 Europe. On a global scale, IAVs spread from multiple geographical regions to multiple  
295 geographical destinations including sub-Saharan Africa.

296

297 Co-circulation of different IAV subtypes and clades is common during epidemics of seasonal  
298 influenza, which may facilitate intra-subtype reassortment events among circulating viruses  
299 [47-51]. Overall, the reassortment rates among the sub-Saharan African A(H1N1)pdm09  
300 viruses (0.1272-0.3231) were comparable to the 0.15-0.8 events/lineage/year estimated  
301 among global A(H1N1)pdm09 viruses [41]. However, sub-Saharan African A(H3N2) viruses  
302 reassorted at a lower mean rate of 0.0577 [95 per cent HPD, 0.0146-0.1027] than the global  
303 estimate of 0.35-0.65 events/lineage/year [41]. Although A(H3N2) viruses undergo frequent  
304 reassortment events globally, the low reassortment rate among some A(H3N2) viruses might  
305 be due to the resulting reassortant viruses being unfit and negatively selected, thus not  
306 detected in appreciable frequencies [52, 53]. Circulation of intra-subtype reassortants in our  
307 study for 1-2 consecutive years demonstrates that IAVs can persist in the population and  
308 spread geographically. A recent continentwide study of the rates and patterns of reassortment  
309 of IAVs in Africa revealed that novel reassortant viruses emerged every year, with some  
310 reassortant viruses persisting in different countries and regions for 1-5 consecutive years [46].  
311 Persistence of intra-subtype reassortants has been demonstrated previously [52, 54], although  
312 the factors associated with such persistence patterns at a population level require further  
313 investigation. For example, a reassortant A(H3N2) virus subclade, designated 3C.3A2/re,  
314 emerged in 2016-17 influenza season and resulted in more hospitalizations and deaths in the  
315 2017-18 North American influenza season [52]. Increased whole genome sequencing over  
316 consecutive influenza seasons, particularly in understudied sub-Saharan Africa regions,

317 would allow for an improved understanding of the frequency and timing of such intra-  
318 subtype reassortments and the contribution to the evolutionary and transmission dynamics of  
319 seasonal influenza.

320

321 Globally, we observed significant migration pathways for IAVs. Taken together, these results  
322 suggest that the global spread of A(H1N1)pdm09 and A(H3N2) virus epidemics are driven  
323 by different geographical regions, which also includes sub-Saharan Africa, in which E-SE  
324 Asia and North America are major transmission sources [17, 19, 20, 55]. Our findings  
325 support the notion that influenza viruses persist as temporally migrating metapopulations in  
326 which new virus strains can emerge in any geographical region, with the location of the  
327 source population changing regularly [17]. This underscores the need for improved influenza  
328 surveillance particularly in understudied sub-Saharan Africa regions for complete  
329 understanding of the global patterns of spread of influenza.

330

331 The paucity of sequence data from other African countries limited our analysis of the patterns  
332 of spread and persistence of IAVs in the continent, which might have been useful to  
333 demonstrate intra-continental spread of influenza viruses in detail, since persistence may be  
334 facilitated by climatic variability that generates temporally overlapping epidemics in  
335 neighboring countries. Despite this paucity, our study leveraged on existing national  
336 surveillance studies, for example, from the countrywide surveillance of influenza viruses in  
337 Kenya where A(H1N1)pdm09 virus sequences were included. It is possible that Africa plays  
338 a bigger role in the spread of influenza, which we might not have captured. Furthermore, the  
339 analysis in this report only involved the coding regions of the A(H1N1)pdm09 and A(H3N2)  
340 virus gene segments. Although noncoding regions are conserved, mutations that affect viral  
341 replication may occur, and this information may not have been captured in this study.

342

343 In conclusion, despite sparse data from influenza surveillance in sub-Saharan Africa, our  
344 findings support the notion that influenza viruses persist as temporally structured migrating  
345 metapopulations in which new virus strains can emerge in any geographical region, including  
346 in sub-Saharan Africa; these lineages may have been capable of dissemination to other  
347 continents through a globally migrating virus population. Further knowledge of the viral  
348 lineages that circulate within understudied sub-Saharan Africa regions is required to inform  
349 vaccination strategies in those regions.

## 350 References

- 351 1. Garten, R.J., et al., *Antigenic and genetic characteristics of swine-origin 2009*  
352 *A(H1N1) influenza viruses circulating in humans*. *Science*, 2009. **325**(5937): p. 197-  
353 201.
- 354 2. Dawood, F.S., et al., *Emergence of a Novel Swine-Origin Influenza A (H1N1) Virus in*  
355 *Humans*. *New England Journal of Medicine*, 2009. **360**(25): p. 2605-2615.
- 356 3. CDC, *Outbreak of swine-origin influenza A (H1N1) virus infection—Mexico, March–*  
357 *April 2009*. *MMWR Morb. Mortal. Wkly Rep.*, 2009. **58**(17): p. 467-470.
- 358 4. Lemey, P., M. Suchard, and A. Rambaut, *Reconstructing the initial global spread of a*  
359 *human influenza pandemic: a Bayesian spatial-temporal model for the global spread*  
360 *of H1N1pdm*. *PLoS Curr Biol*, 2009. **1**(RRN1031).
- 361 5. Zhang, Y.Z. and E.C. Holmes, *A Genomic Perspective on the Origin and Emergence of*  
362 *SARS-CoV-2*. *Cell*, 2020. **181**(2): p. 223-227.
- 363 6. Burki, T., *The origin of SARS-CoV-2*. *The Lancet Infectious Diseases*, 2020. **20**(9): p.  
364 1018-1019.
- 365 7. Worobey, M., et al., *The emergence of SARS-CoV-2 in Europe and North America*.  
366 *Science*, 2020. **370**(6516): p. 564.
- 367 8. Lemey, P., et al., *Accommodating individual travel history and unsampled diversity in*  
368 *Bayesian phylogeographic inference of SARS-CoV-2*. *Nat Commun*, 2020. **11**(1): p.  
369 5110.
- 370 9. Rito, T., et al., *Phylogeography of 27,000 SARS-CoV-2 Genomes: Europe as the Major*  
371 *Source of the COVID-19 Pandemic*. *Microorganisms*, 2020. **8**(11).
- 372 10. Ye, Z.W., et al., *Zoonotic origins of human coronaviruses*. *Int J Biol Sci*, 2020. **16**(10):  
373 p. 1686-1697.
- 374 11. World Health Organization, *Non-pharmaceutical public health measures for*  
375 *mitigating the risk and impact of epidemic and pandemic influenza*. 2019, Geneva:  
376 World Health Organization.
- 377 12. McCloskey, B., et al., *Mass gathering events and reducing further global spread of*  
378 *COVID-19: a political and public health dilemma*. *The Lancet*, 2020. **395**(10230): p.  
379 1096-1099.
- 380 13. CDC. *Past Pandemics*. 2009 [cited 2021 07 March]; Available from:  
381 <https://www.cdc.gov/flu/pandemic-resources/basics/past-pandemics.html>.
- 382 14. World Health Organization. *Global Influenza Surveillance and Response System*  
383 *(GISRS)*. 2021 [cited 2021 07 March]; Available from:  
384 [https://www.who.int/influenza/gisrs\\_laboratory/en/](https://www.who.int/influenza/gisrs_laboratory/en/).
- 385 15. Rambaut, A., et al., *The genomic and epidemiological dynamics of human influenza A*  
386 *virus*. *Nature*, 2008. **453**: p. 615+.
- 387 16. Russell, C.A., et al., *The global circulation of seasonal influenza A (H3N2) viruses*.  
388 *Science (New York, N.Y.)*, 2008. **320**(5874): p. 340-346.
- 389 17. Bahl, J., et al., *Temporally structured metapopulation dynamics and persistence of*  
390 *influenza A H3N2 virus in humans*. *Proc Natl Acad Sci U S A*, 2011. **108**(48): p. 19359-  
391 64.
- 392 18. Bedford, T., et al., *Global migration dynamics underlie evolution and persistence of*  
393 *human influenza A (H3N2)*. *PLoS Pathog*, 2010. **6**(5): p. e1000918.
- 394 19. Bedford, T., et al., *Global circulation patterns of seasonal influenza viruses vary with*  
395 *antigenic drift*. *Nature*, 2015. **523**(7559): p. 217-20.



- 396 20. Lemey, P., et al., *Unifying viral genetics and human transportation data to predict*  
397 *the global transmission dynamics of human influenza H3N2*. PLoS Pathog, 2014.  
398 **10**(2): p. e1003932.
- 399 21. Gessner, B.D., N. Shindo, and S. Briand, *Seasonal influenza epidemiology in sub-*  
400 *Saharan Africa: a systematic review*. The Lancet Infectious Diseases, 2011. **11**(3): p.  
401 223-235.
- 402 22. Ng, S. and A. Gordon, *Influenza Burden and Transmission in the Tropics*. Current  
403 Epidemiology Reports, 2015. **2**(2): p. 89-100.
- 404 23. Wang, X., et al., *Global burden of respiratory infections associated with seasonal*  
405 *influenza in children under 5 years in 2018: a systematic review and modelling study*.  
406 The Lancet Global Health, 2020. **8**(4): p. e497-e510.
- 407 24. Viboud, C., et al., *Contrasting the epidemiological and evolutionary dynamics of*  
408 *influenza spatial transmission*. Philos Trans R Soc Lond B Biol Sci, 2013. **368**(1614): p.  
409 20120199.
- 410 25. O'Brien, K.L., et al., *Causes of severe pneumonia requiring hospital admission in*  
411 *children without HIV infection from Africa and Asia: the PERCH multi-country case-*  
412 *control study*. The Lancet, 2019. **394**(10200): p. 757-779.
- 413 26. Levine, O.S., et al., *The Pneumonia Etiology Research for Child Health Project: a 21st*  
414 *century childhood pneumonia etiology study*. Clin Infect Dis, 2012. **54 Suppl 2**: p. S93-  
415 101.
- 416 27. Driscoll, A.J., et al., *Standardization of Laboratory Methods for the PERCH Study*.  
417 Clinical Infectious Diseases, 2017. **64**(suppl\_3): p. S245-S252.
- 418 28. Owuor, D.C., et al., *Characterizing the Countrywide Epidemic Spread of Influenza*  
419 *A(H1N1)pdm09 Virus in Kenya between 2009 and 2018*. Viruses, 2021. **13**(10): p.  
420 1956.
- 421 29. Owuor, D.C., et al., *Genetic characterization of influenza A(H3N2) viruses circulating*  
422 *in coastal Kenya, 2009-2017*. Influenza and Other Respiratory Viruses, 2020. **14**(3): p.  
423 320-330.
- 424 30. Feikin, D.R., et al., *Is Higher Viral Load in the Upper Respiratory Tract Associated With*  
425 *Severe Pneumonia? Findings From the PERCH Study*. Clin Infect Dis, 2017.  
426 **64**(suppl\_3): p. S337-S346.
- 427 31. Zhou, B. and D.E. Wentworth, *Influenza A virus molecular virology techniques*.  
428 Methods Mol Biol, 2012. **865**: p. 175-92.
- 429 32. Shepard, S.S., et al., *Viral deep sequencing needs an adaptive approach: IRMA, the*  
430 *iterative refinement meta-assembler*. BMC Genomics, 2016. **17**: p. 708.
- 431 33. Larsson, A., *AliView: a fast and lightweight alignment viewer and editor for large*  
432 *datasets*. Bioinformatics, 2014. **30**(22): p. 3276-3278.
- 433 34. Vaidya, G., D.J. Lohman, and R. Meier, *SequenceMatrix: concatenation software for*  
434 *the fast assembly of multi-gene datasets with character set and codon information*.  
435 Cladistics, 2011. **27**: p. 171-180.
- 436 35. Nguyen, L.-T., et al., *IQ-TREE: A Fast and Effective Stochastic Algorithm for Estimating*  
437 *Maximum-Likelihood Phylogenies*. Molecular Biology evolution, 2014. **32**(1): p. 268-  
438 274.
- 439 36. Kalyaanamoorthy, S., et al., *ModelFinder: fast model selection for accurate*  
440 *phylogenetic estimates*. Nat Methods, 2017. **14**(6): p. 587-589.

- 441 37. Yu, G., et al., *ggtree: an r package for visualization and annotation of phylogenetic*  
442 *trees with their covariates and other associated data*. *Methods in Ecology and*  
443 *Evolution*, 2017. **8**(1): p. 28-36.
- 444 38. Han, A.X., et al., *Phylogenetic Clustering by Linear Integer Programming (PhyCLIP)*.  
445 *Mol Biol Evol*, 2019. **36**(7): p. 1580-1595.
- 446 39. Sagulenko, P., V. Puller, and R.A. Neher, *TreeTime: Maximum-likelihood*  
447 *phylogenetic analysis*. *Virus Evol*, 2018. **4**(1): p. vex042.
- 448 40. Galili, T., *dendextend: an R package for visualizing, adjusting and comparing trees of*  
449 *hierarchical clustering*. *Bioinformatics*, 2015. **31**(22): p. 3718-3720.
- 450 41. Müller, N.F., et al., *Bayesian inference of reassortment networks reveals fitness*  
451 *benefits of reassortment in human influenza viruses*. *Proceedings of the National*  
452 *Academy of Sciences*, 2020. **117**(29): p. 17104-17111.
- 453 42. Nagarajan, N. and C. Kingsford, *GiRaF: robust, computational identification of*  
454 *influenza reassortments via graph mining*. *Nucleic acids research*, 2011. **39**(6): p.  
455 e34-e34.
- 456 43. Ronquist, F., et al., *MrBayes 3.2: efficient Bayesian phylogenetic inference and model*  
457 *choice across a large model space*. *Systematic biology*, 2012. **61**(3): p. 539-542.
- 458 44. Suchard, M.A., et al., *Bayesian phylogenetic and phylodynamic data integration*  
459 *using BEAST 1.10*. *Virus Evolution*, 2018. **4**(1).
- 460 45. Bielejec, F., et al., *Spread3: Interactive Visualization of Spatiotemporal History and*  
461 *Trait Evolutionary Processes*. *Mol Biol Evol*, 2016. **33**(8): p. 2167-9.
- 462 46. Nabakooza, G., et al., *Whole-genome analysis to determine the rate and patterns of*  
463 *intra-subtype reassortment among influenza type-A viruses in Africa*. *Virus Evolution*,  
464 2022. **8**(1).
- 465 47. Holmes, E.C., et al., *Whole-genome analysis of human influenza A virus reveals*  
466 *multiple persistent lineages and reassortment among recent H3N2 viruses*. *PLoS Biol*,  
467 2005. **3**(9): p. e300.
- 468 48. Nelson, M.I., et al., *Molecular Epidemiology of A/H3N2 and A/H1N1 Influenza Virus*  
469 *during a Single Epidemic Season in the United States*. *PLOS Pathogens*, 2008. **4**(8): p.  
470 e1000133.
- 471 49. Nelson, M.I., et al., *Multiple Reassortment Events in the Evolutionary History of H1N1*  
472 *Influenza A Virus Since 1918*. *PLOS Pathogens*, 2008. **4**(2): p. e1000012.
- 473 50. Zhang, X.S., et al., *Co-circulation of influenza A virus strains and emergence of*  
474 *pandemic via reassortment: the role of cross-immunity*. *Epidemics*, 2013. **5**(1): p. 20-  
475 33.
- 476 51. Maljkovic Berry, I., et al., *Frequency of influenza H3N2 intra-subtype reassortment:*  
477 *attributes and implications of reassortant spread*. *BMC Biology*, 2016. **14**(1): p. 117.
- 478 52. Potter, B.I., et al., *Evolution and rapid spread of a reassortant A(H3N2) virus that*  
479 *predominated the 2017–2018 influenza season*. *Virus Evolution*, 2019. **5**(2).
- 480 53. Villa, M. and M. Lässig, *Fitness cost of reassortment in human influenza*. *PLOS*  
481 *Pathogens*, 2017. **13**(11): p. e1006685.
- 482 54. Westgeest, K.B., et al., *Genomewide analysis of reassortment and evolution of*  
483 *human influenza A(H3N2) viruses circulating between 1968 and 2011*. *J Virol*, 2014.  
484 **88**(5): p. 2844-57.
- 485 55. Su, Y.C., et al., *Phylogenetics of H1N1/2009 influenza reveals the transition from*  
486 *host adaptation to immune-driven selection*. *Nat Commun*, 2015. **6**: p. 7952.
- 487

488 **Supporting Information**

489 **Conflict of Interest.** None.

490

491 **Disclosure.** The findings and conclusions in this report are those of the authors and do not  
492 necessarily represent the official position of the Centers for Disease Control and Prevention.

493

494 **Funding.** Pneumonia Etiology Research for Child Health (PERCH) was supported by the  
495 Bill and Melinda Gates Foundation (grant number 48968 to the International Vaccine Access  
496 Center, Department of International Health, Johns Hopkins Bloomberg School of Public  
497 Health). This work was also supported through the DELTAS Africa Initiative [DEL-15-003].  
498 The DELTAS Africa Initiative is an independent funding scheme of the African Academy of  
499 Sciences (AAS)'s Alliance for Accelerating Excellence in Science in Africa (AESA) and  
500 supported by the New Partnership for Africa's Development Planning and Coordinating  
501 Agency (NEPAD Agency) with funding from the Wellcome Trust [107769/Z/10/Z] and the  
502 UK government. The study was also part funded by a Wellcome Trust grant [1029745] and a  
503 USA CDC grant [GH002133]. The paper is published with the permission of the Director of  
504 KEMRI.

505

506 **Acknowledgements.** We would like to acknowledge the Pneumonia Etiology Research for  
507 Child Health (PERCH) Study Group for their role in the PERCH study design, coordination,  
508 implementation, and reporting.

509

510 **Tables and Figures legends**

511 **Table 1.** MrBayes convergence diagnostics for A(H1N1)pdm09 viruses.

512

513 **Table 2.** MrBayes convergence diagnostics for A(H3N2) viruses.

514

515 **Table 3.** Asymmetrical migration rates between global location states inferred using the  
516 BSSVS model for influenza A(H1N1)pdm09 virus. BSSVS; Bayesian stochastic search  
517 variable selection (BSSVS) model.

518

519 **Table 4.** Asymmetrical migration rates between global location states inferred using the  
520 BSSVS model for influenza A(H3N2) virus. Bayesian stochastic search variable selection  
521 (BSSVS) model.

522

523 **Figure 1.** Phylogenetic trees of the eight individual gene segments of influenza  
524 A(H1N1)pdm09 viruses from sub-Saharan Africa from the 2011-13 influenza seasons. The  
525 tree branches and tips are coloured by virus clade, as shown on the colour-coded key. The  
526 positions of intra-subtype reassortant viruses in each phylogeny are indicated by filled stars  
527 for PERCH study viruses while viruses from other sub-Saharan African countries are  
528 indicated by filled diamonds. PERCH, Pneumonia Etiology Research for Child Health.

529

530 **Figure 2.** Phylogenetic trees of the eight individual gene segments of influenza A(H3N2)  
531 viruses from sub-Saharan Africa from the 2011-13 influenza seasons. The tree branches and  
532 tips are coloured by virus clade, as shown on the colour-coded key. The positions of intra-  
533 subtype reassortant viruses in each phylogeny are indicated by filled stars for PERCH study  
534 viruses while viruses from other sub-Saharan African countries are indicated by filled  
535 diamonds. PERCH, Pneumonia Etiology Research for Child Health.

536

537 **Figure 3.** Evolutionary relationships of each gene segment of influenza A(H1N1)pdm09  
538 viruses from sub-Saharan Africa, displaying intra-subtype reassortment with the subtype,  
539 highlighting the reassortant strains by clade from the 2011-13 influenza seasons.

540

541 **Figure 4.** Evolutionary relationships of each gene segment of influenza A(H3N2) viruses  
542 from sub-Saharan Africa, displaying intra-subtype reassortment with the subtype,  
543 highlighting the reassortant strains by clade from the 2011-13 influenza seasons.

544

545 **Figure 5.** Number of viral imports and exports from sub-Saharan Africa shown as an  
546 alluvium plot using virus sequences from sub-Saharan African countries, Asia, Europe, North  
547 America, South America, and Oceania for (A) influenza A(H1N1)pdm09 viruses and (B)  
548 influenza A(H3N2) viruses.

549

#### 550 **Supplementary Figures**

551 **Figure S1.** (A) PERCH study surveillance sites in sub-Saharan Africa, which include The  
552 Gambia, Kenya, Mali, South Africa, and Zambia. PERCH, Pneumonia Etiology Research for  
553 Child Health. (B) Time-resolved maximum-likelihood phylogenetic tree of influenza  
554 A(H1N1)pdm09 viruses from sub-Saharan Africa and other global regions. (C) Time-  
555 resolved maximum-likelihood phylogenetic tree of influenza A(H3N2) viruses from sub-  
556 Saharan Africa and other global regions. The tree tips for figures B and C are coloured by  
557 sampling location, as shown on the colour-coded key.

558

559 **Figure S2.** Global dynamics of spread of A(H1N1)pdm09 viruses reconstructed using  
560 global virus sequences from sub-Saharan Africa and other global countries. Asymmetric

561 migration pathways between location states were inferred for all global regions. Coloured  
562 line arrows indicate significant migration routes from one continent to another, while line  
563 thickness represents the degree of statistical support. Red arrowed lines are shown to indicate  
564 decisive migration routes with Bayes factor (BF) support  $\geq 1000$ ; green lines represent very  
565 strongly supported routes with  $100 \leq \text{BF} < 1000$ ; blue lines indicate strongly supported routes  
566  $10 \leq \text{BF} < 100$ ; and purple dotted lines indicate supported routes with  $3 \leq \text{BF} < 10$ .

567

568 **Figure S3. Global dynamics of spread of A(H3N2) viruses reconstructed using global**  
569 **virus sequences from sub-Saharan Africa and other global countries.** Asymmetric  
570 migration pathways between location states were inferred for all global regions. Coloured  
571 line arrows indicate significant migration routes from one continent to another, while line  
572 thickness represents the degree of statistical support. Red arrowed lines are shown to indicate  
573 decisive migration routes with Bayes factor (BF) support  $\geq 1000$ ; green lines represent very  
574 strongly supported routes with  $100 \leq \text{BF} < 1000$ ; blue lines indicate strongly supported routes  
575  $10 \leq \text{BF} < 100$ ; and purple dotted lines indicate supported routes with  $3 \leq \text{BF} < 10$ .

**Table 1.** MrBayes convergence diagnostics for A(H1N1)pdm09 viruses.

| 200 million generations‡                         |                                                 | PB2     | PB1      | PA       | HA       | NP      | NA       | MP       | NS       |
|--------------------------------------------------|-------------------------------------------------|---------|----------|----------|----------|---------|----------|----------|----------|
| <sup>a</sup> <b>Stability of log likelihoods</b> | Log likelihood (run 1)                          | -6748   | -6878    | -6393    | -5793    | -3984   | -4216    | -2673    | -2411    |
|                                                  | Log likelihood (run 2)                          | -6747   | -6726    | -6393    | -5795    | -3986   | -4314    | -2675    | -2357    |
|                                                  | Average standard deviation of split frequencies | 0.00997 | 0.009990 | 0.009995 | 0.009968 | 0.01000 | 0.000368 | 0.000574 | 0.009997 |
|                                                  | Good mixing of logs, runs 1 and 2               | Yes     | Yes      | Yes      | Yes      | Yes     | Yes      | Yes      | Yes      |
| <sup>b</sup> <b>Parameter estimates</b>          | ESS                                             | 566     | 338      | 286      | 386      | 510     | 786      | 648      | 324      |
|                                                  | PSRF                                            | All = 1 | All = 1  | All = 1  | All = 1  | All = 1 | All = 1  | All = 1  | All = 1  |

‡ MrBayes computes all these metrics based on the relative burn-in of 25% of the chain length.

<sup>a</sup> **Stability of the log likelihood sampled by the cold chain:** Likelihoods stabilized for runs 1 and 2. Average standard deviation of split frequencies should converge towards 0.0. A plot of the generation versus the log probability of the data should be well mixed i.e., no distinct trend of increase or decrease over time. The run shows good mixing of log probabilities from both run 1 and run 2.

<sup>b</sup> **Parameter estimates:** Estimated Sample Size (ESS) value below 100 may indicate that the parameter is under sampled. The Potential Scale Reduction Factor (PSRF) should approach 1 as the runs converge. All ESS values are over 100 and all PSRF values are equal to 1.

**Table 2.** MrBayes convergence diagnostics for A(H3N2) viruses.

| 100 million generations‡                         |                                                 | PB2      | PB1      | PA       | HA       | NP       | NA       | MP       | NS      |
|--------------------------------------------------|-------------------------------------------------|----------|----------|----------|----------|----------|----------|----------|---------|
| <sup>a</sup> <b>Stability of log likelihoods</b> | Log likelihood (run 1)                          | -6408    | -6403    | -5885    | -4373    | -3619    | -3634    | -2303    | -1944   |
|                                                  | Log likelihood (run 2)                          | -6408    | -6307    | -5884    | -4374    | -3618    | -3633    | -2303    | -1943   |
|                                                  | Average standard deviation of split frequencies | 0.009992 | 0.009984 | 0.009965 | 0.009994 | 0.009970 | 0.009983 | 0.009966 | 0.00996 |
|                                                  | Good mixing of logs, runs 1 and 2               | Yes      | Yes      | Yes      | Yes      | Yes      | Yes      | Yes      | Yes     |
| <sup>b</sup> <b>Parameter estimates</b>          | ESS                                             | 674      | 246      | 845      | 584      | 483      | 1011     | 529      | 394     |
|                                                  | PSRF                                            | All = 1  | All = 1  | All = 1  | All = 1  | 1- 1.063 | 1-1.139  | All = 1  | All = 1 |

‡ MrBayes computes all these metrics based on the relative burn-in of 25% of the chain length.

<sup>a</sup> **Stability of the log likelihood sampled by the cold chain:** Likelihoods stabilized for runs 1 and 2. Average standard deviation of split frequencies should converge towards 0.0. A plot of the generation versus the log probability of the data should be well mixed i.e., no distinct trend of increase or decrease over time. The run shows good mixing of log probabilities from both run 1 and run 2.

<sup>b</sup> **Parameter estimates:** Estimated Sample Size (ESS) value below 100 may indicate that the parameter is under sampled. The Potential Scale Reduction Factor (PSRF) should approach 1 as the runs converge. All ESS values are over 100 and all PSRF values are equal to 1.



**Table 3.** Asymmetrical migration rates between global location states inferred using the BSSVS model for influenza A(H1N1)pdm09 virus.

| Migration rates* |             |             |             |             |               |             |               |
|------------------|-------------|-------------|-------------|-------------|---------------|-------------|---------------|
| †                | Africa      | Asia        | E-SE Asia   | Europe      | North America | Oceania     | South America |
| Africa           | —           | 0.97        | 0.95        | 0.97        | 0.98          | 0.96        | 0.99          |
| Asia             | 0.96        | —           | <b>0.88</b> | 0.83        | 0.99          | 0.95        | 0.95          |
| E-SE Asia        | <b>1.48</b> | <b>0.81</b> | —           | <b>2.83</b> | <b>3</b>      | <b>1.5</b>  | 0.89          |
| Europe           | 0.93        | 0.94        | 0.95        | —           | 0.95          | 0.95        | <b>0.56</b>   |
| North America    | 0.87        | 1.01        | <b>0.52</b> | <b>0.73</b> | —             | <b>0.58</b> | 0.95          |
| Oceania          | 0.84        | 0.88        | 0.86        | 0.81        | 0.87          | —           | 0.88          |
| South America    | 0.82        | 0.85        | 0.84        | 0.93        | 0.84          | 0.88        | —             |

\*Migration rates in bold indicate supported rates with Bayes factor  $\geq 3$ .

†Number of sequences: sub-Saharan Africa, 150; Asia, 17; E-SE Asia, 131; Europe, 82; North America, 170; South America, 2; and Oceania, 39.

**Table 4.** Asymmetrical migration rates between global location states inferred using the BSSVS model for influenza A(H3N2) virus.

| Migration rates* |             |             |             |             |               |             |               |
|------------------|-------------|-------------|-------------|-------------|---------------|-------------|---------------|
| †                | Africa      | Asia        | E-SE Asia   | Europe      | North America | Oceania     | South America |
| Africa           | —           | 0.98        | 0.97        | 0.99        | 0.69          | 0.79        | 0.97          |
| Asia             | 0.91        | —           | 0.92        | 0.92        | 0.96          | 0.96        | 0.93          |
| E-SE Asia        | <b>0.77</b> | <b>0.92</b> | —           | <b>1.19</b> | <b>2.27</b>   | <b>3.34</b> | <b>0.62</b>   |
| Europe           | 0.93        | 0.97        | 0.97        | —           | 0.9           | 0.96        | 0.93          |
| North America    | 0.96        | 0.97        | 0.85        | <b>0.6</b>  | —             | <b>1.63</b> | <b>0.93</b>   |
| Oceania          | 0.87        | 0.94        | <b>0.78</b> | <b>0.8</b>  | 0.98          | —           | 0.98          |
| South America    | 0.82        | 0.92        | 0.79        | 0.89        | 0.72          | 0.91        | —             |

\*Migration rates in bold indicate supported rates with Bayes factor  $\geq 3$ .

†Number of sequences: sub-Saharan Africa, 94; Asia, 17; E-SE Asia, 179; Europe, 38; North America, 178; South America, 199; and Oceania, 138.





Figure 3

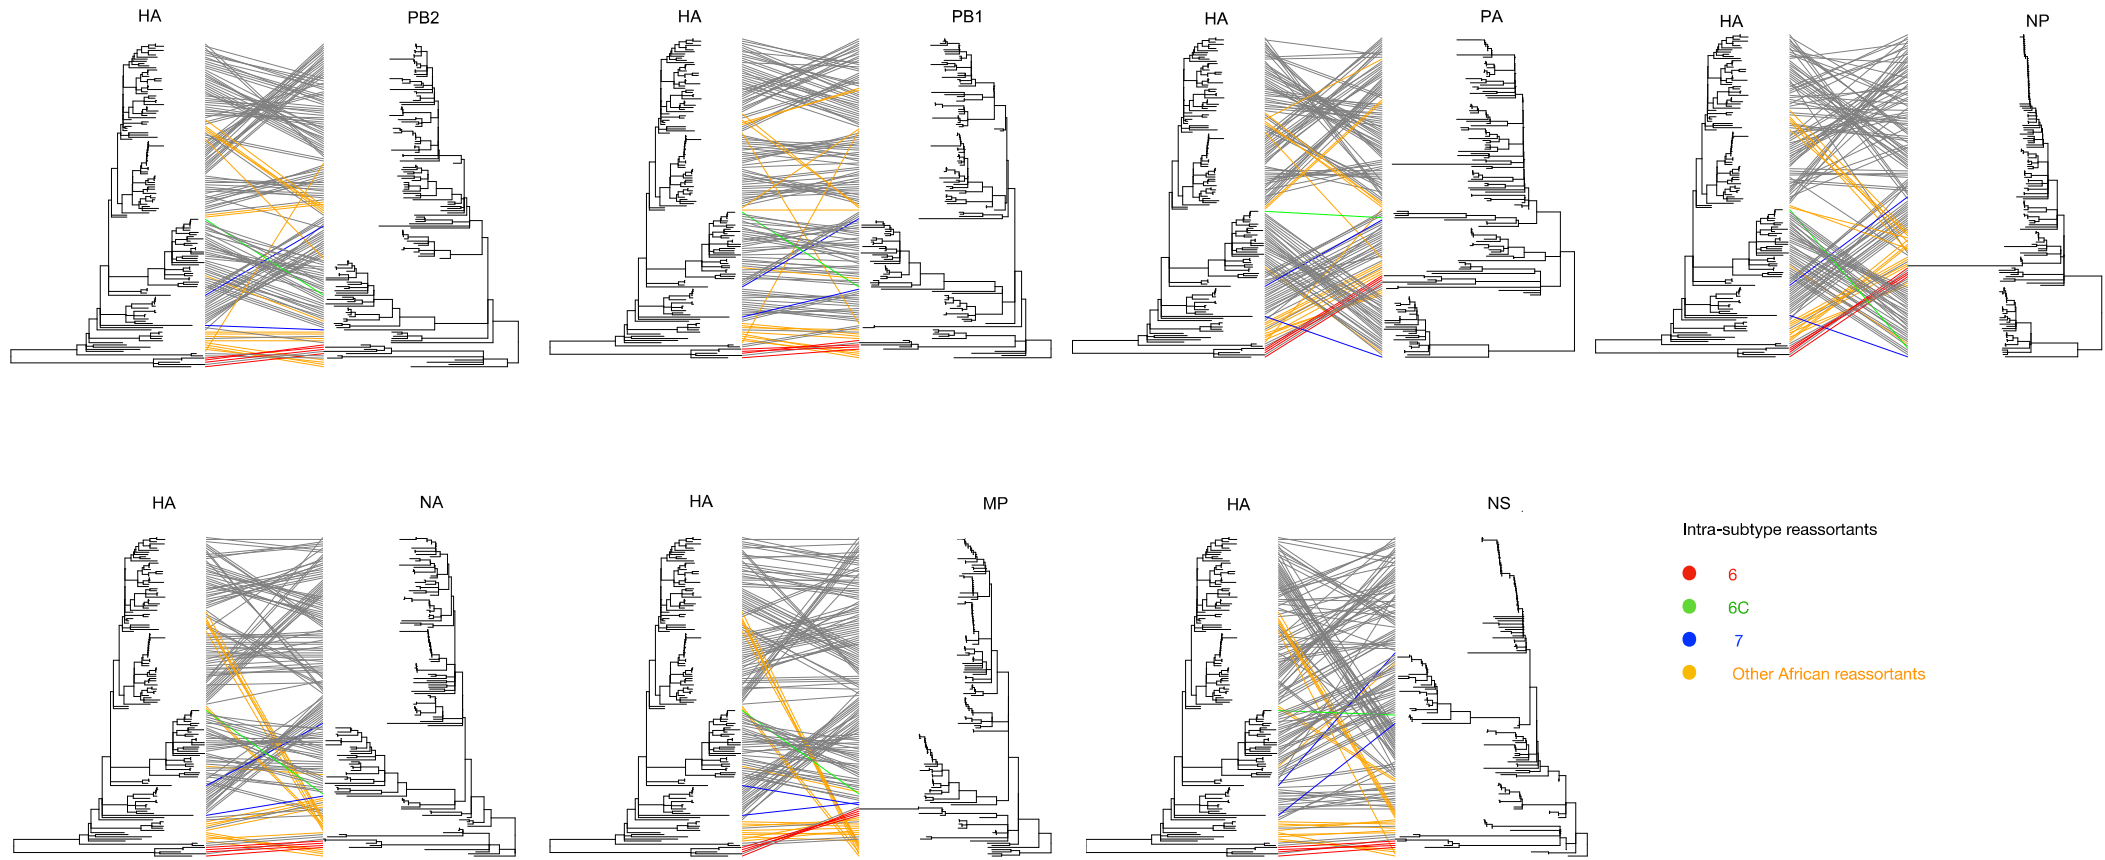

Figure 4

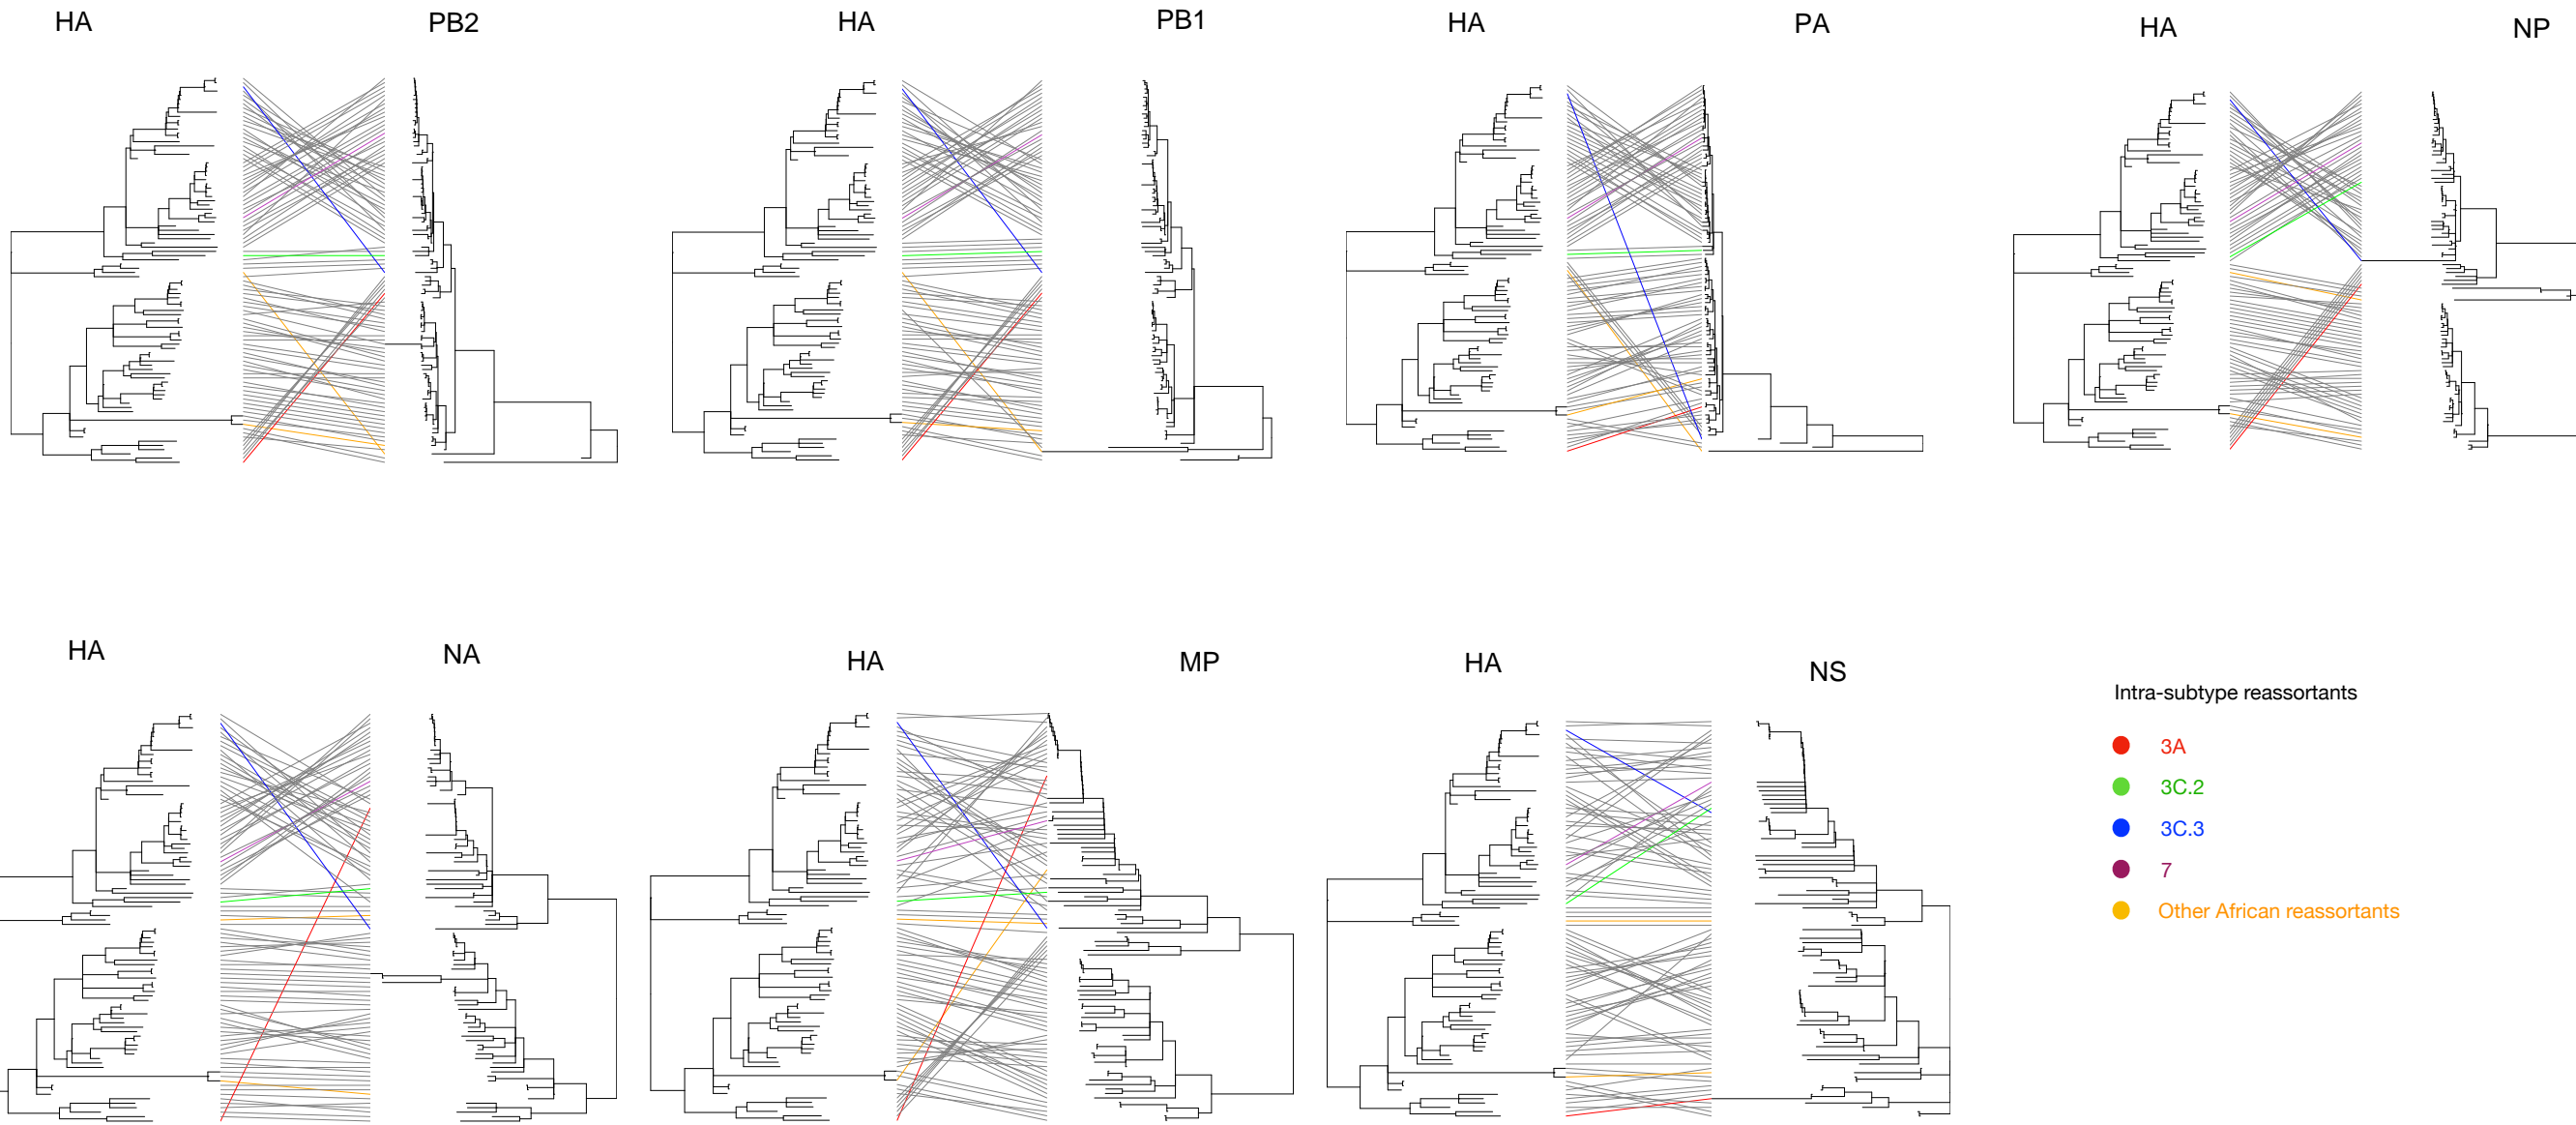

Figure 5

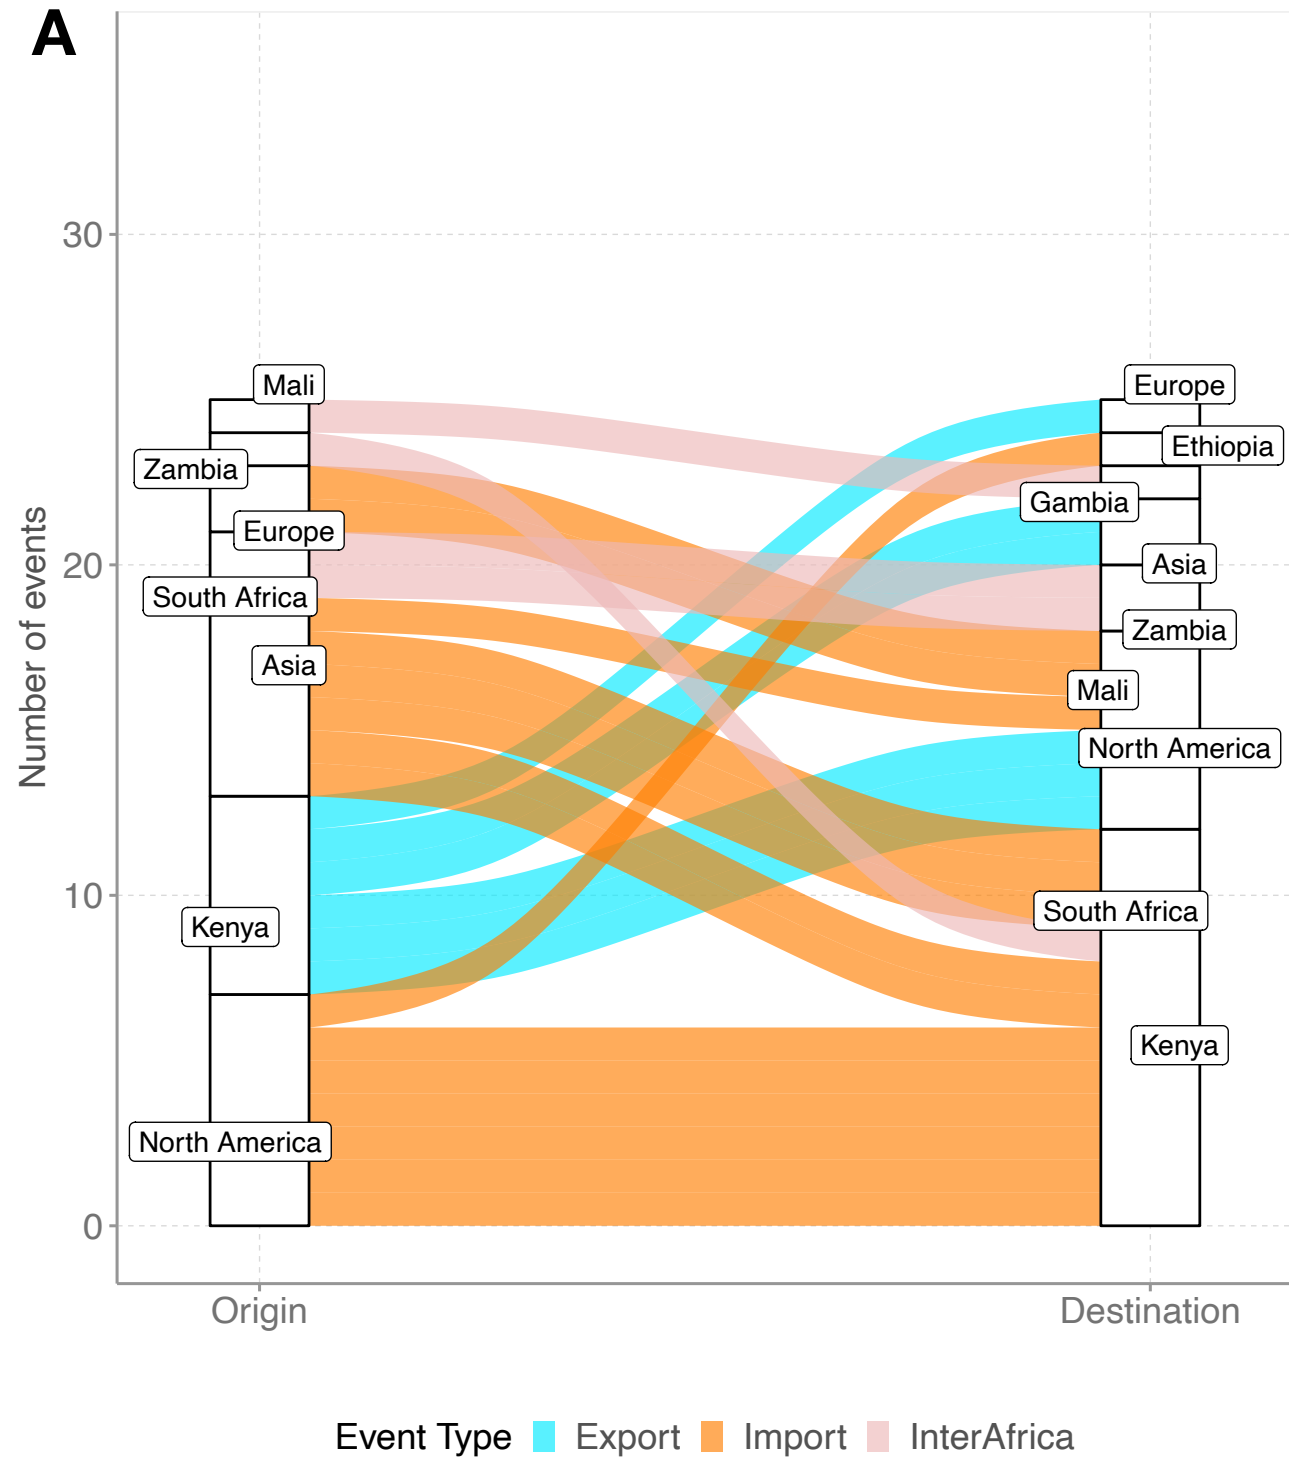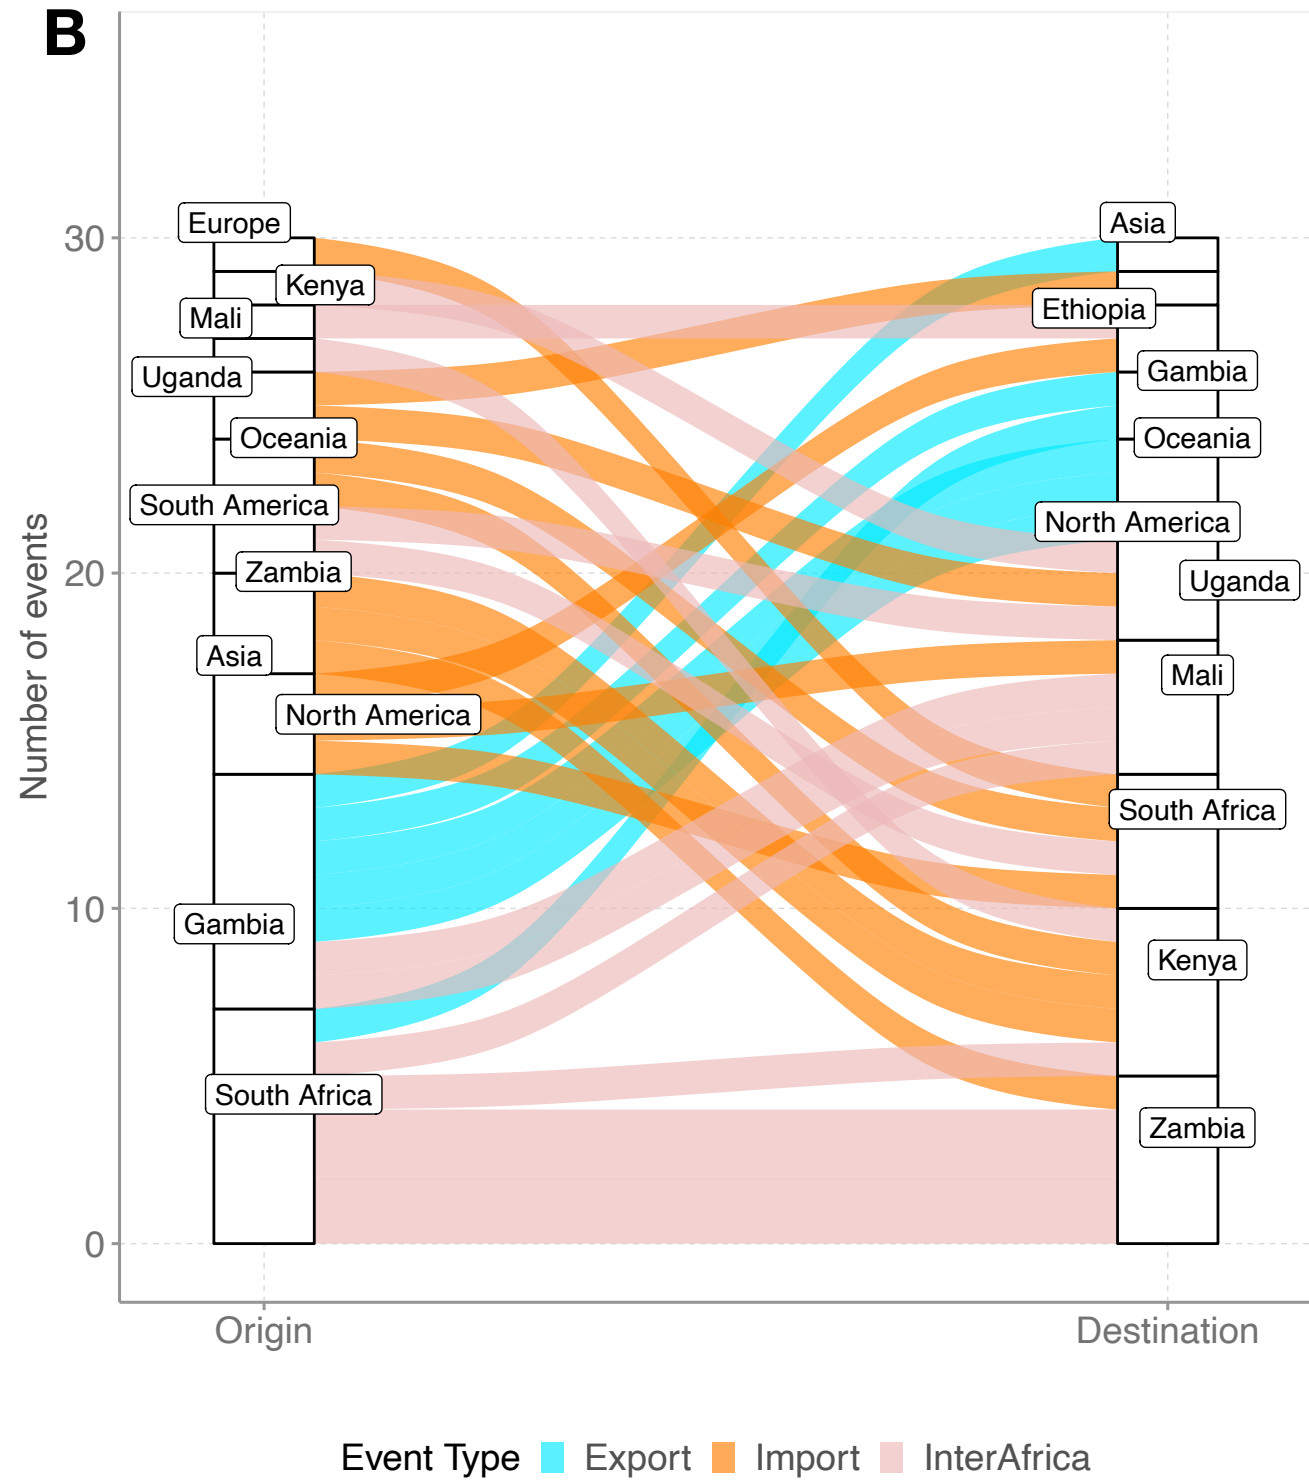



Figure S1

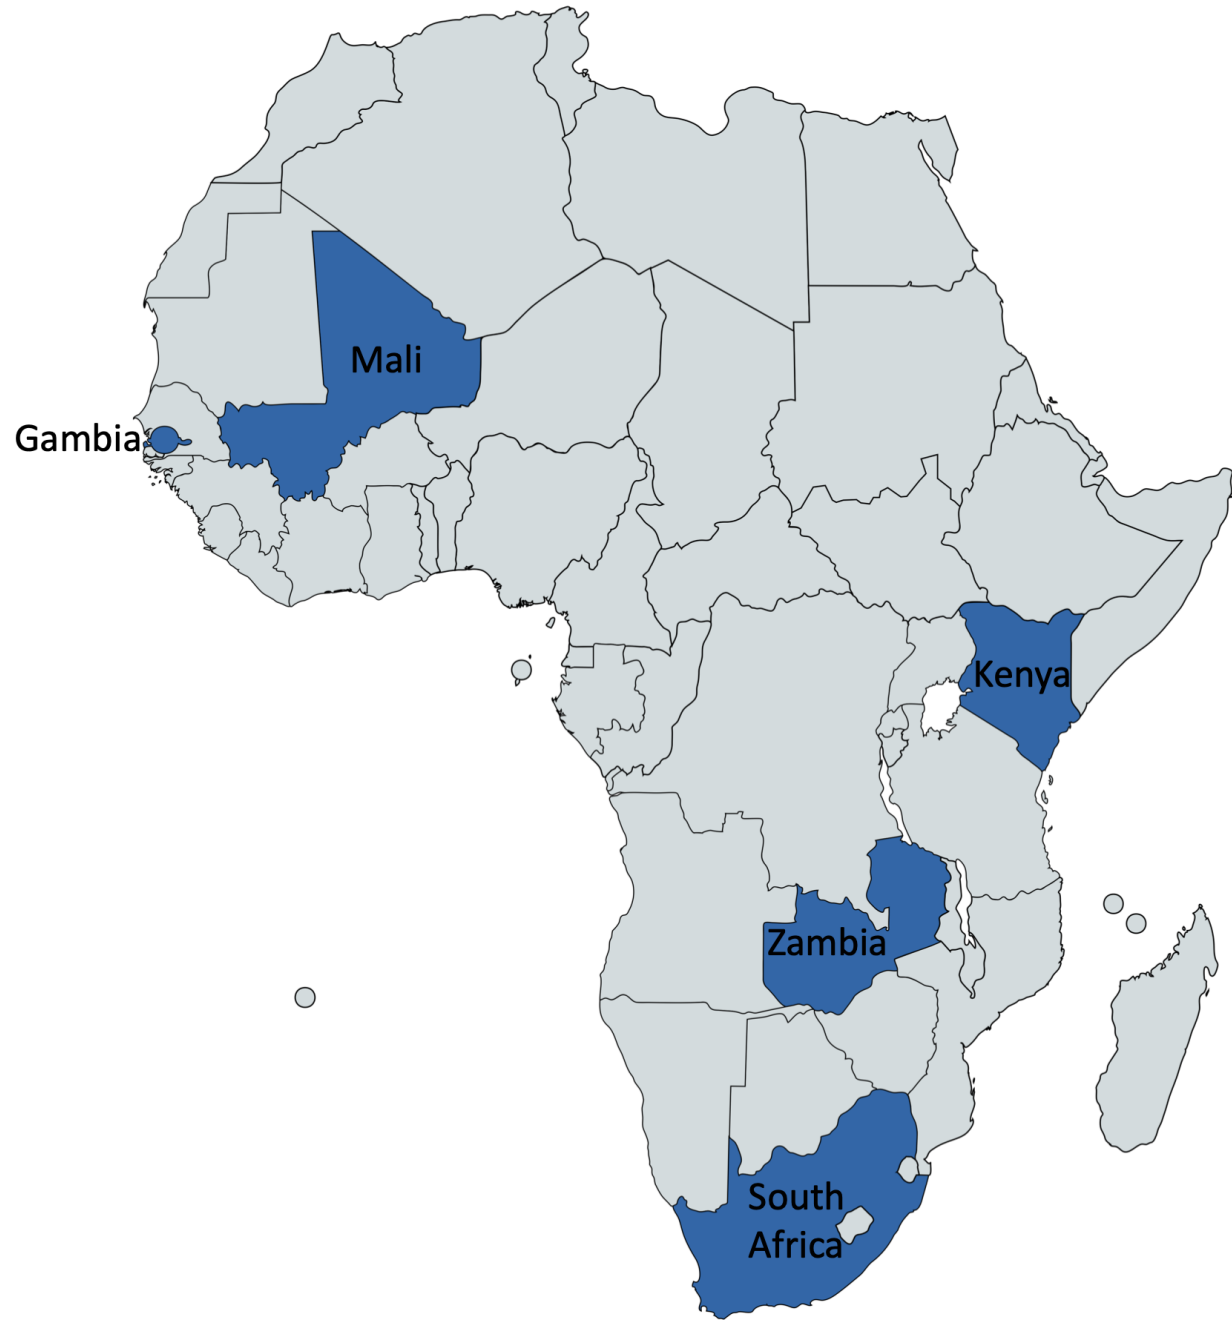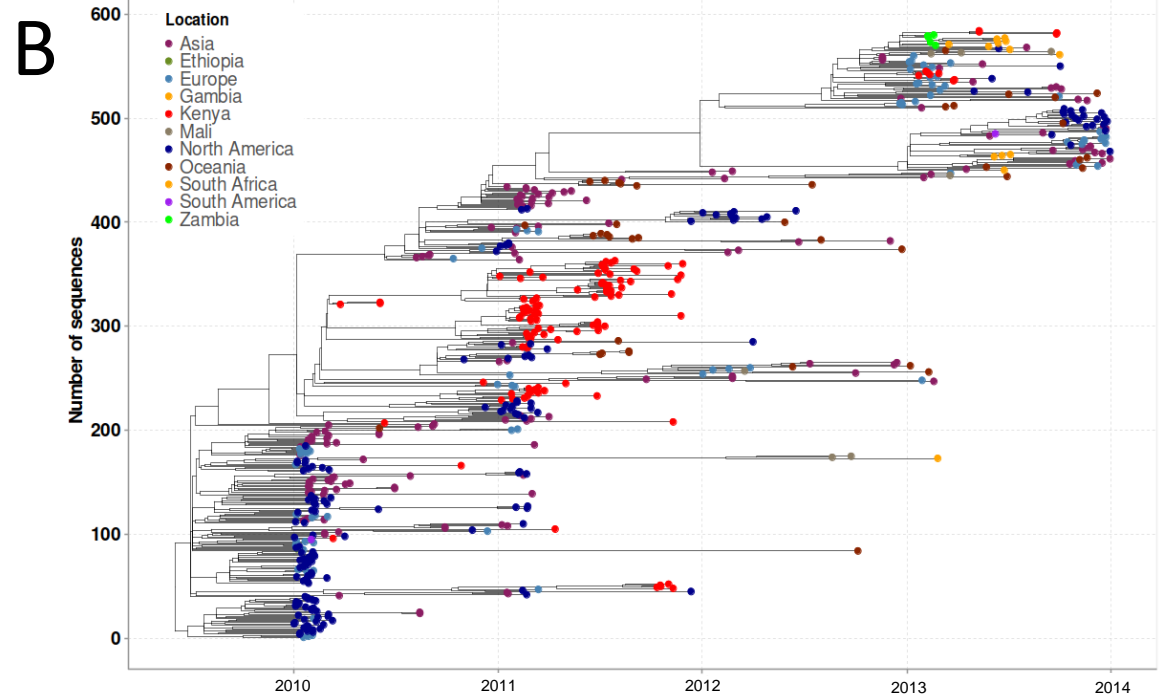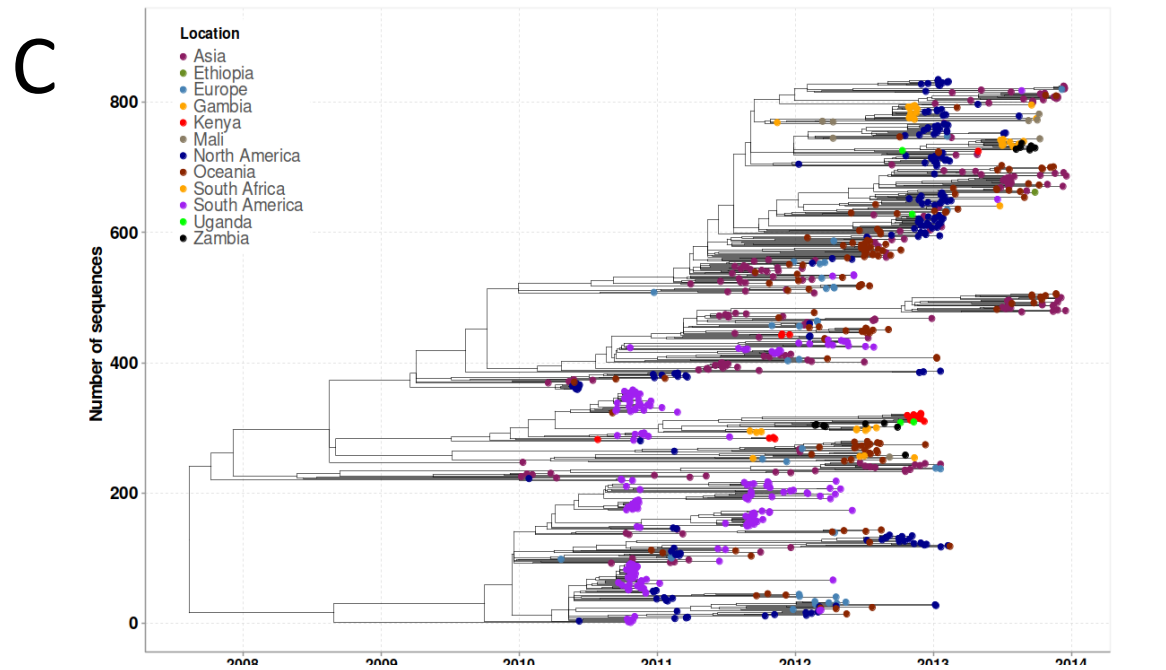



Figure S2

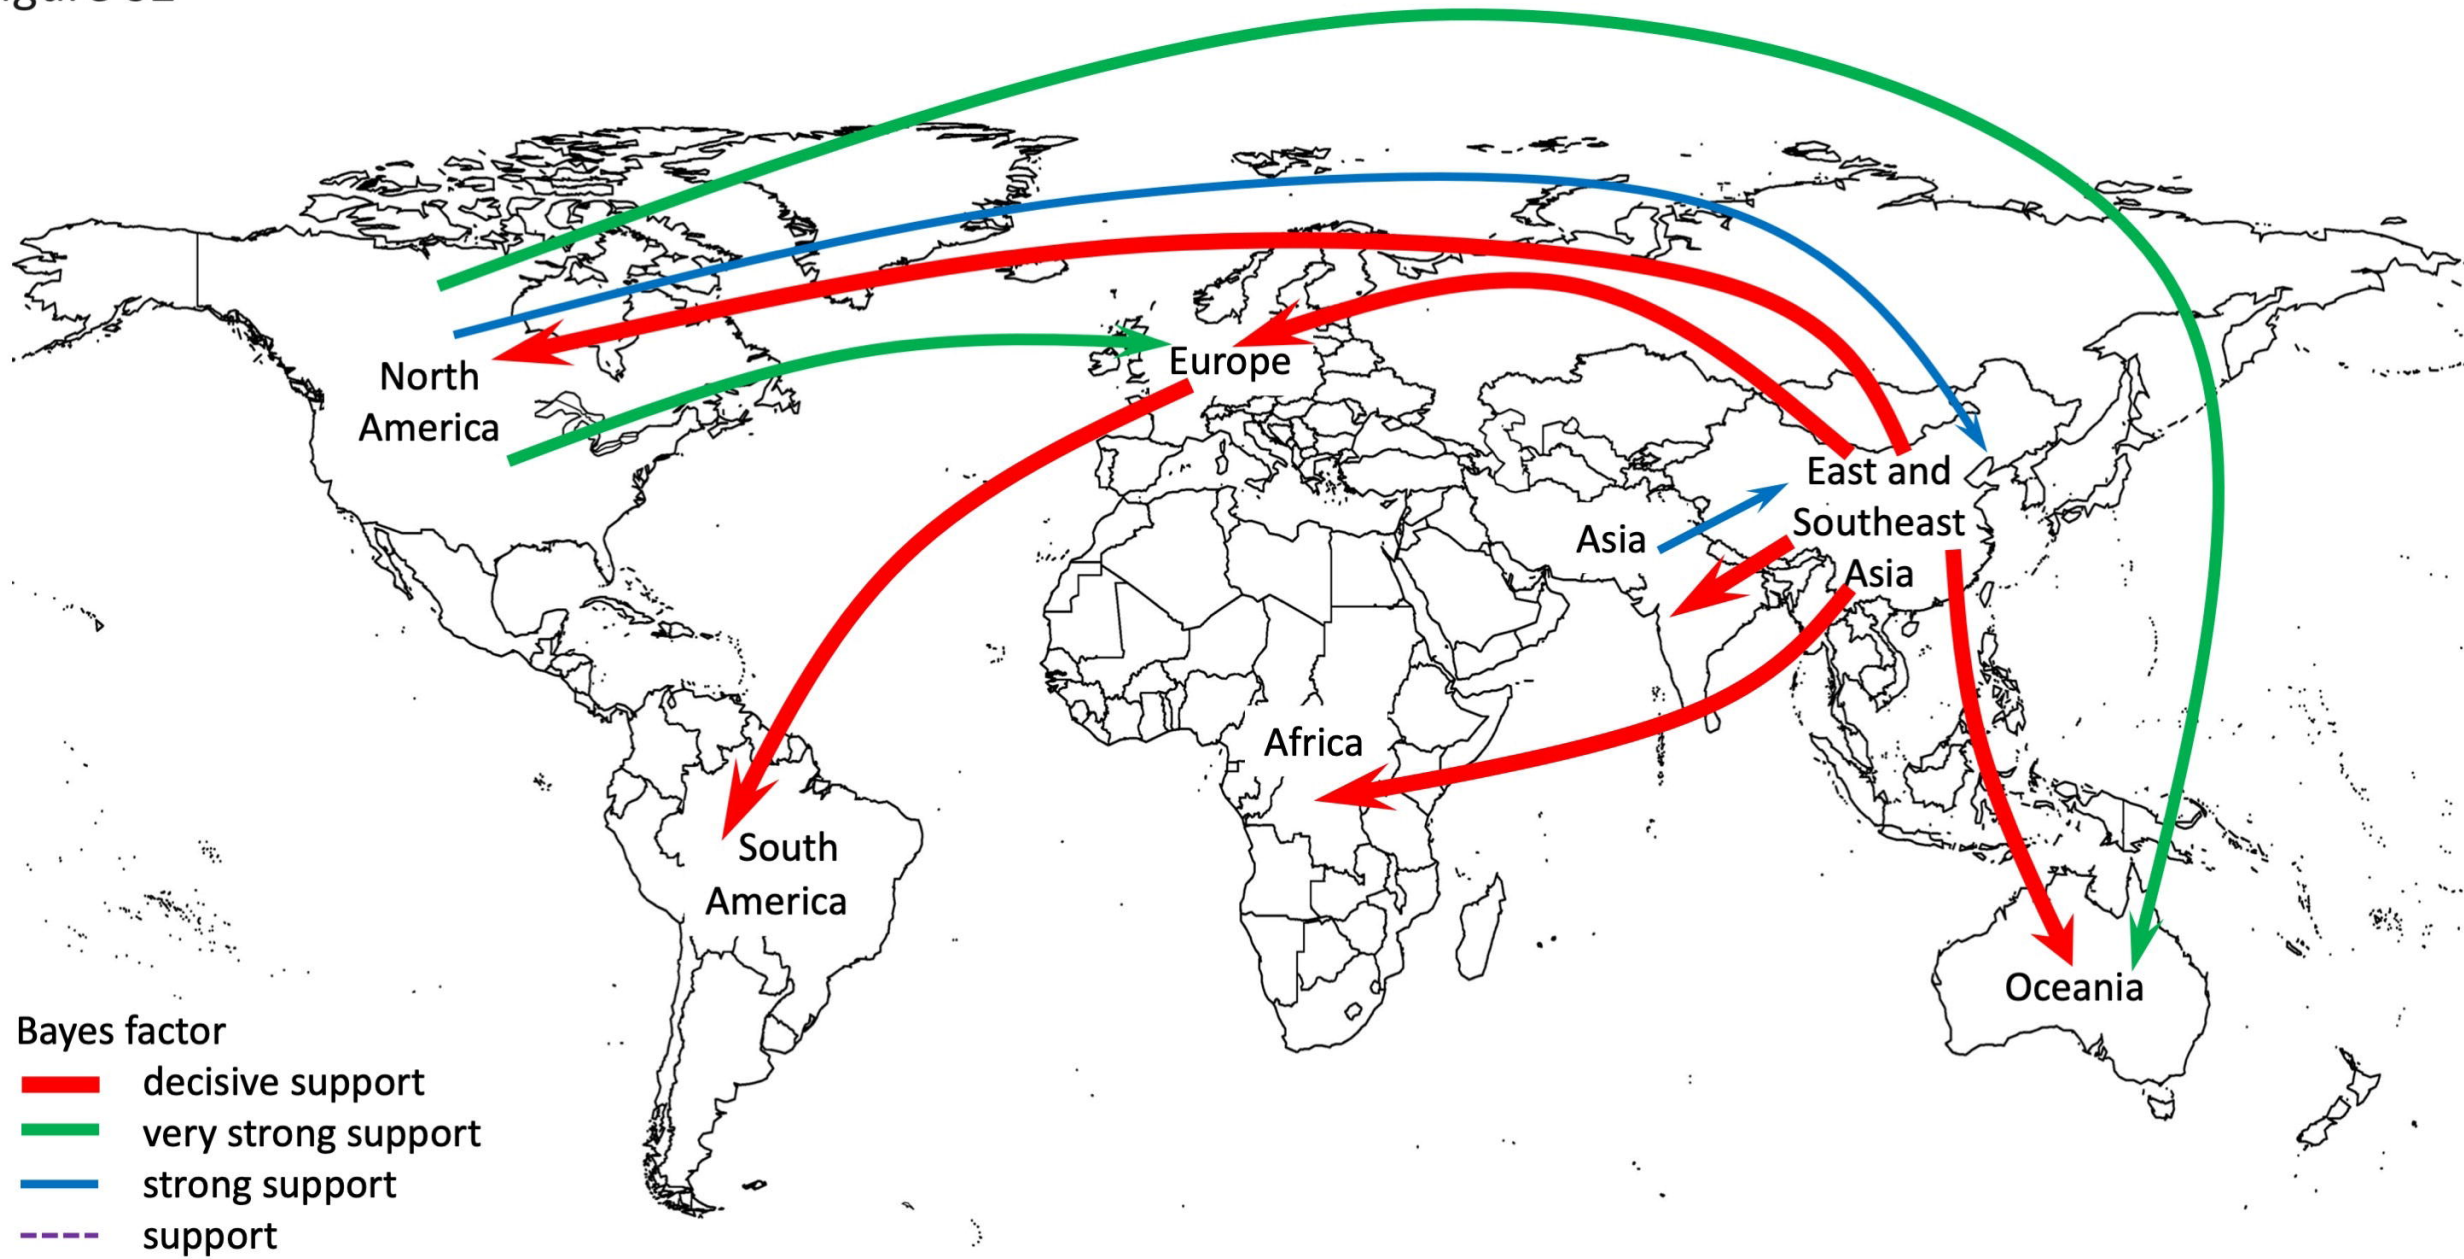

Figure S3

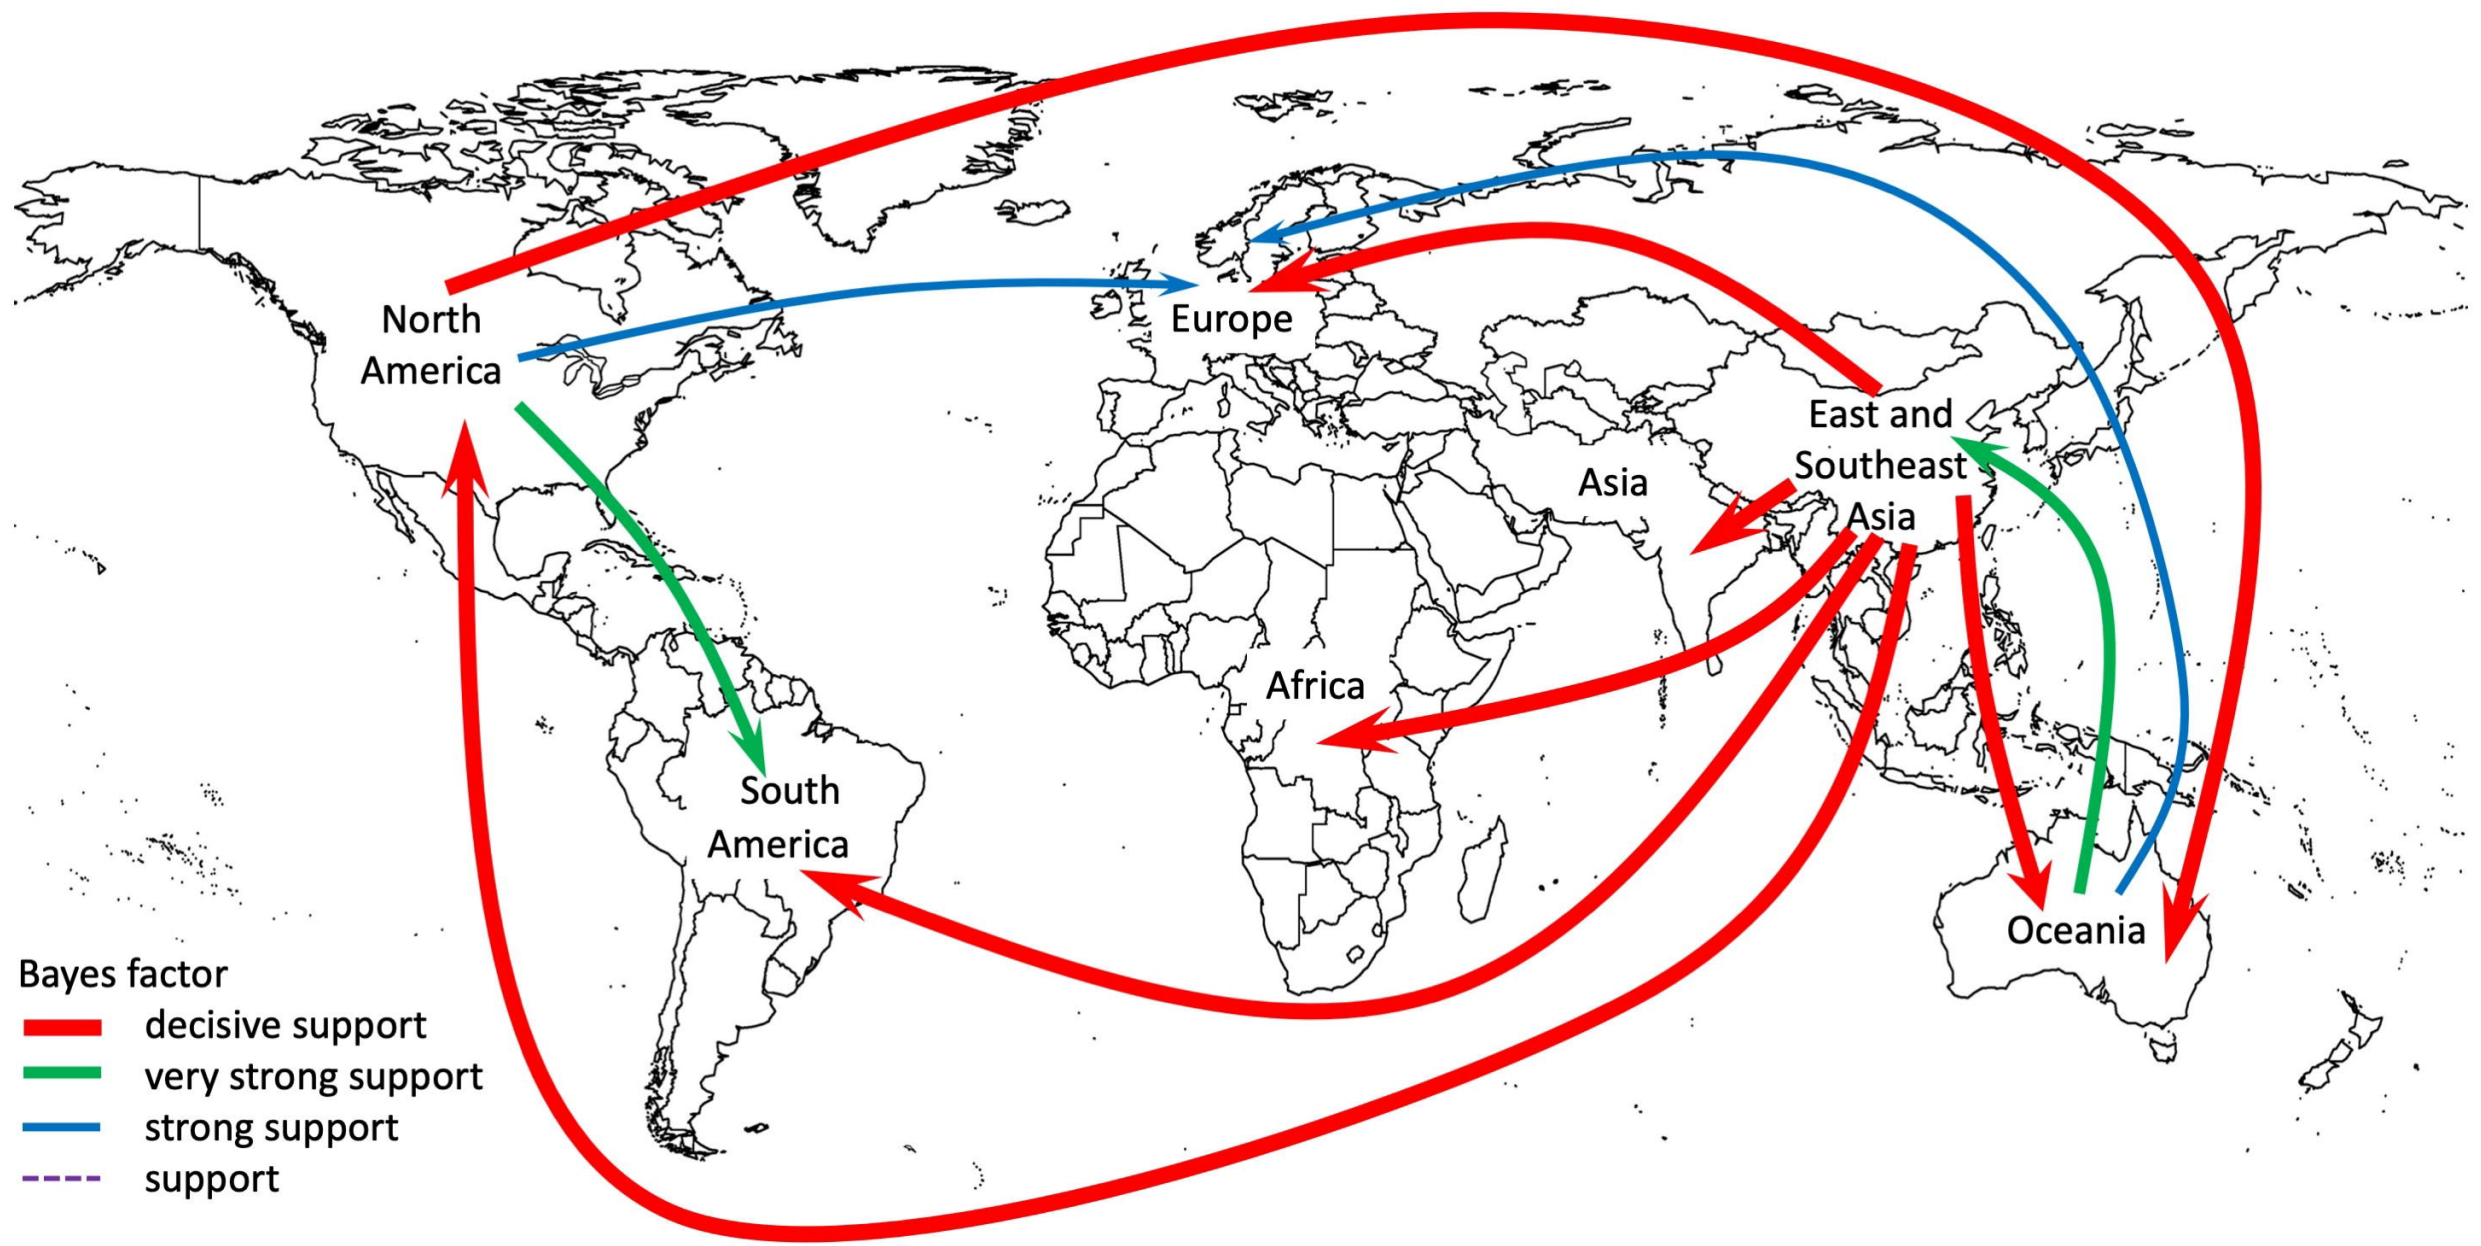

Bayes factor

- decisive support
- very strong support
- strong support
- support
